# Supplementary material for: Controlled oxidation of organic sulfides to sulfoxides under ambient conditions by a series of titanium isopropoxide complexes using environmentally benign H2O2 as an oxidant
Source: Royal Society of Chemistry journal article supplement (doi:10.1039/b921720g), 2010-01-01
Supplement: b921720g.pdf [file b921720g.pdf]

## Supporting Information

# Controlled Oxidation of Organic Sulfides to Sulfoxides Under Ambient Conditions by a Series of Titanium Isopropoxide Complexes Using Environmentally Benign H<sub>2</sub>O<sub>2</sub> as an Oxidant

Manas K. Panda<sup>a</sup>, Mobin M. Shaikh<sup>b</sup> and Prasenjit Ghosh<sup>\*a</sup>

<sup>a</sup>Department of Chemistry and

<sup>b</sup>National Single Crystal X-ray Diffraction Facility,

Indian Institute of Technology Bombay,

Powai, Mumbai 400 076.

Email: [pghosh@chem.iitb.ac.in](mailto:pghosh@chem.iitb.ac.in)

Fax: +91-22-2572-3480

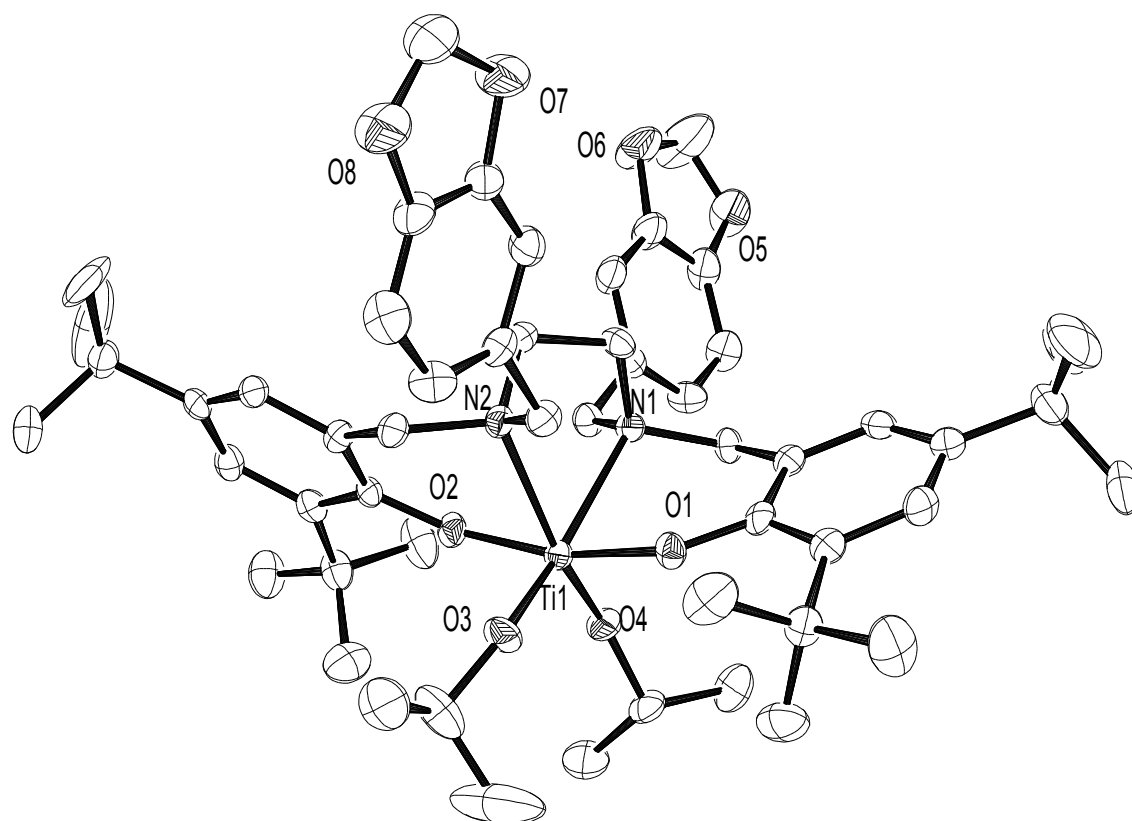

**Figure S1.** ORTEP of **2b**. Hydrogen atoms on carbon are omitted for clarity. Selected bond lengths (Å) and angles (°) are given: Ti1–O1 1.911(2), Ti1–O2 1.908(2), Ti1–O3 1.800(2), Ti1–O4 1.810(2), Ti1–N1 2.381(3), Ti1–N2 2.390(3), O1–Ti1–O3 90.96(9), O2–Ti1–O3 96.37(10), O2–Ti1–O4 91.76(9), O3–Ti1–O4 106.58(10), O1–Ti1–N1 80.45(9), O2–Ti1–N1 89.65(9), O3–Ti1–N1 163.21(9), O4–Ti1–N1 88.82(9).

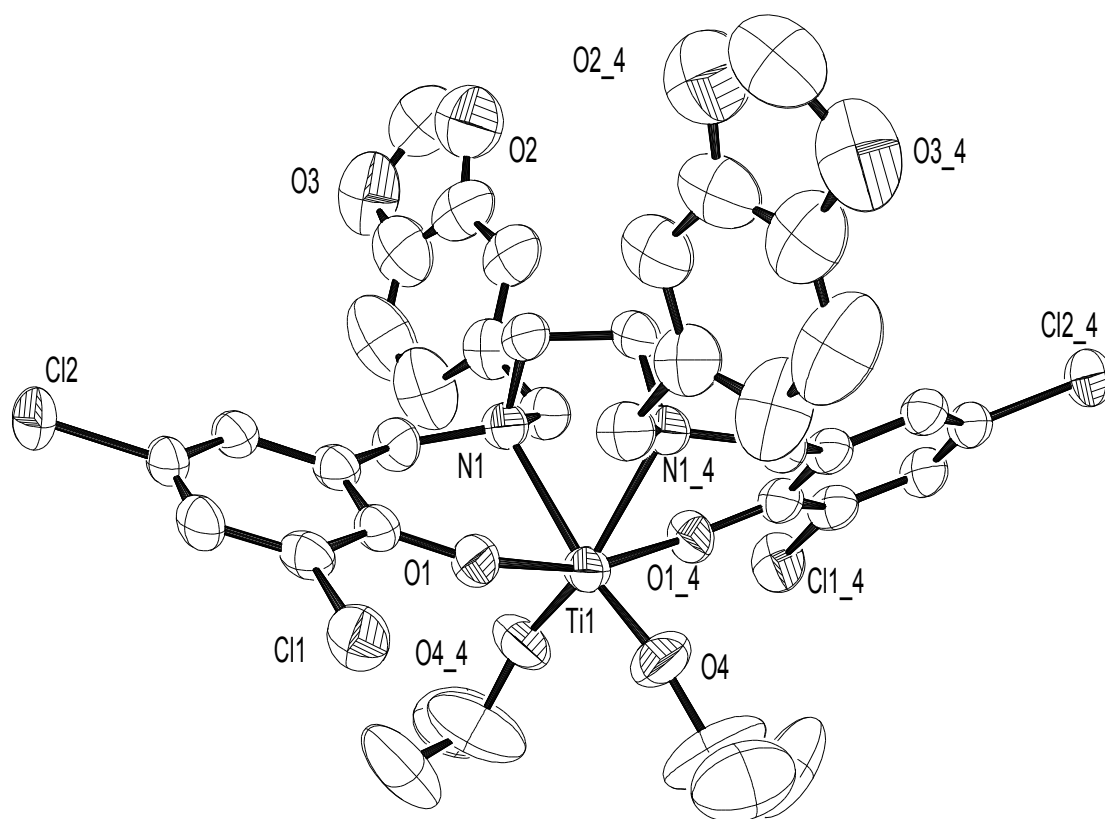

**Figure S2.** ORTEP of **3b**. Hydrogen atoms on carbon are omitted for clarity. Selected bond lengths (Å) and angles (°) are given: Ti1–O1 1.913(3), Ti1–O4 1.776(4), Ti1–O1\_4 1.913(3), Ti1–O4\_4 1.775(4), Ti1–N1 2.354(4), Ti1–N1\_4 2.353(4), O1–Ti1–O4\_4 96.32(16), O4–Ti1–O1\_4 96.32(16), O4–Ti1–O4\_4 106.2(3), O1\_4–Ti1–O4\_4 93.60(15), O1–Ti1–N1\_4 86.13(14), O1\_4–Ti1–N1\_4 80.84(13), O4\_4–Ti1–N1\_4 164.45(18), O4–Ti1–N1\_4 88.96(19).

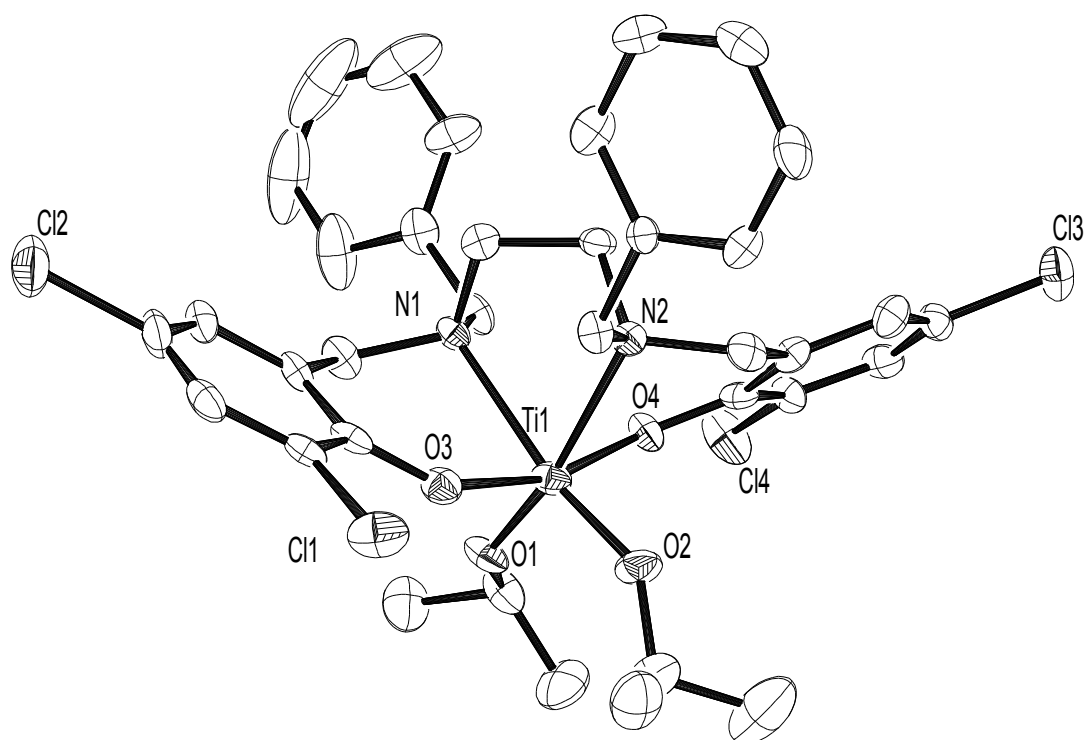

**Figure S3.** ORTEP of **4b**. Hydrogen atoms on carbon are omitted for clarity. Selected bond lengths (Å) and angles (°) are given: Ti1-O1 1.798(3), Ti1-O2 1.782(3), Ti1-O3 1.919(3), Ti1-O4 1.916(3), Ti1-N1 2.376(3), Ti1-N2 2.331(3), O1-Ti1-O2 105.25(14), O2-Ti1-O4 96.68(13), O1-Ti1-N1 90.10(13), O1-Ti1-N2 165.21(13), O2-Ti1-N1 164.46(13), O2-Ti1-N2 88.24(13).

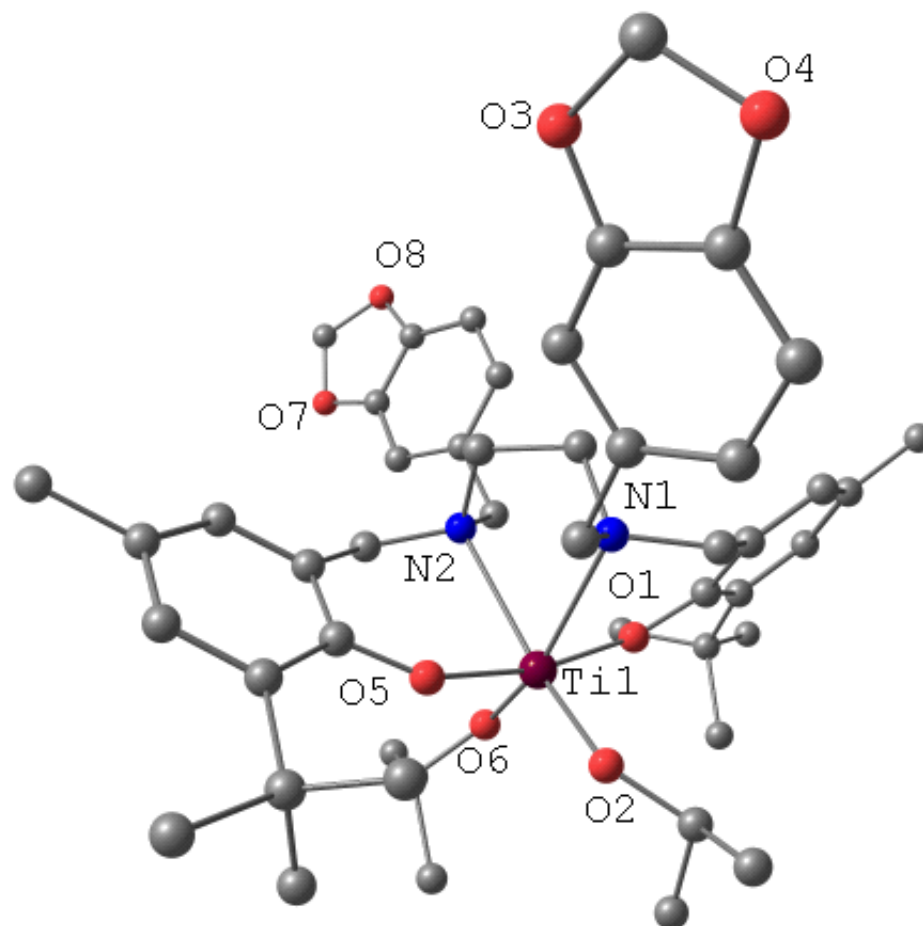

**Figure S4.** Geometry optimized structure of **1b'**. Selected bond lengths (Å) and angles (°): Ti1-O1 1.898, Ti1-O2 1.826, Ti1-O5 1.896, Ti1-O6 1.826, O1-Ti1-O5 167.9, O2-Ti1-O6 107.7, N1-Ti1-N2 72.0.

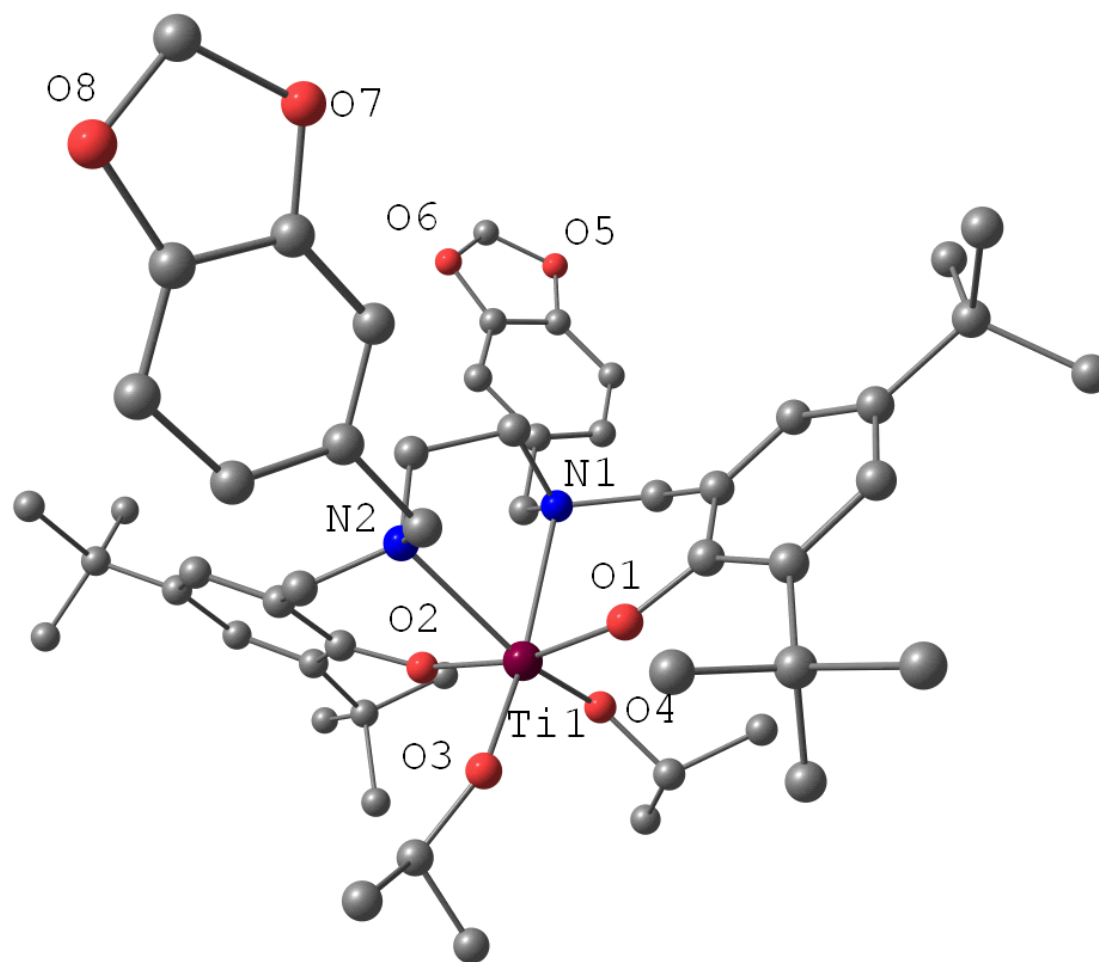

**Figure S5.** Geometry optimized structure of **2b'**. Selected bond lengths (Å) and angles (°): Ti1-O1 1.901, Ti1-O2 1.906, Ti1-O3 1.819, Ti1-O4 1.820, O1-Ti1-O2 166.4, Ti1-N1 2.462, Ti1-N2 2.509.

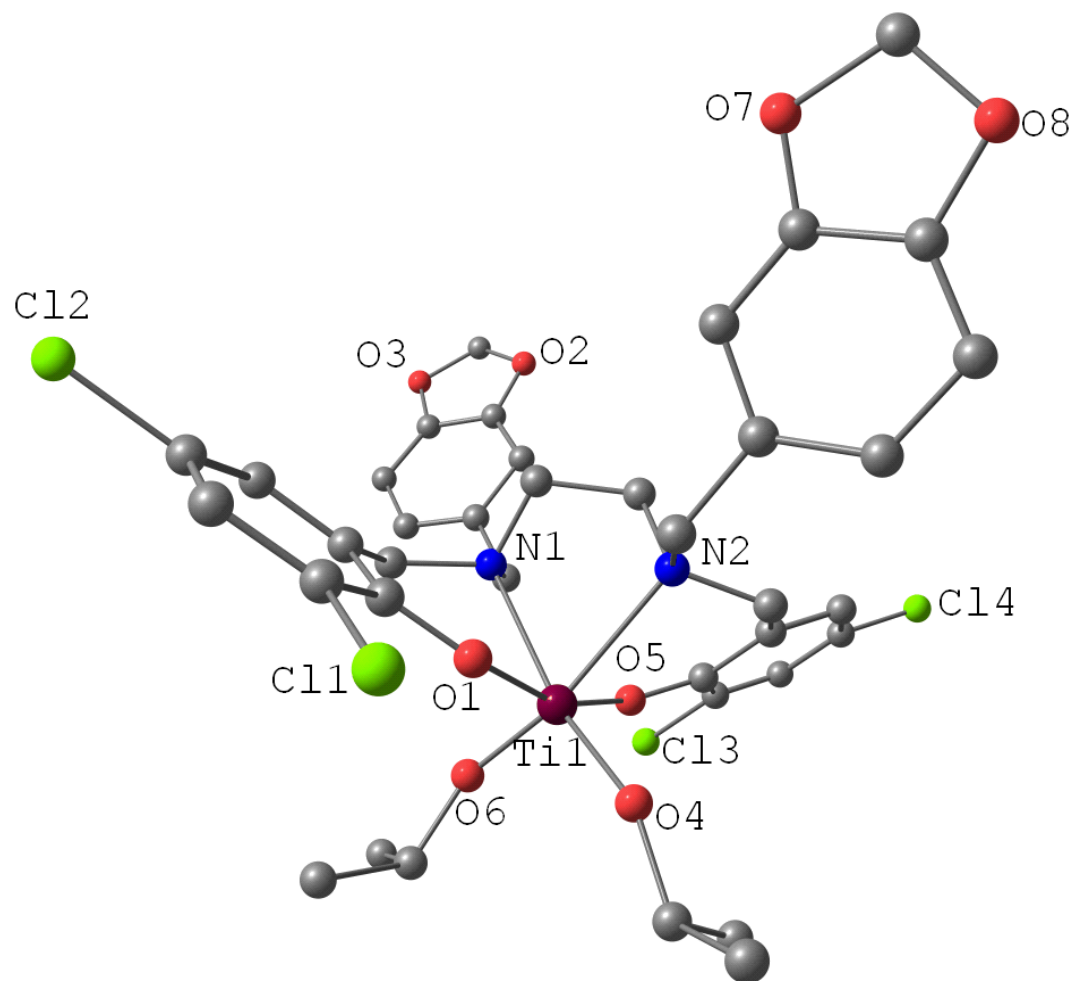

**Figure S6.** Geometry optimized structure of **3b'**. Selected bond lengths (Å) and angles (°): Ti1-O1 1.921, Ti1-O4 1.794, Ti1-O5 1.921, Ti1-O6 1.794, Ti1-N1 2.454, T1-N2 2.454.

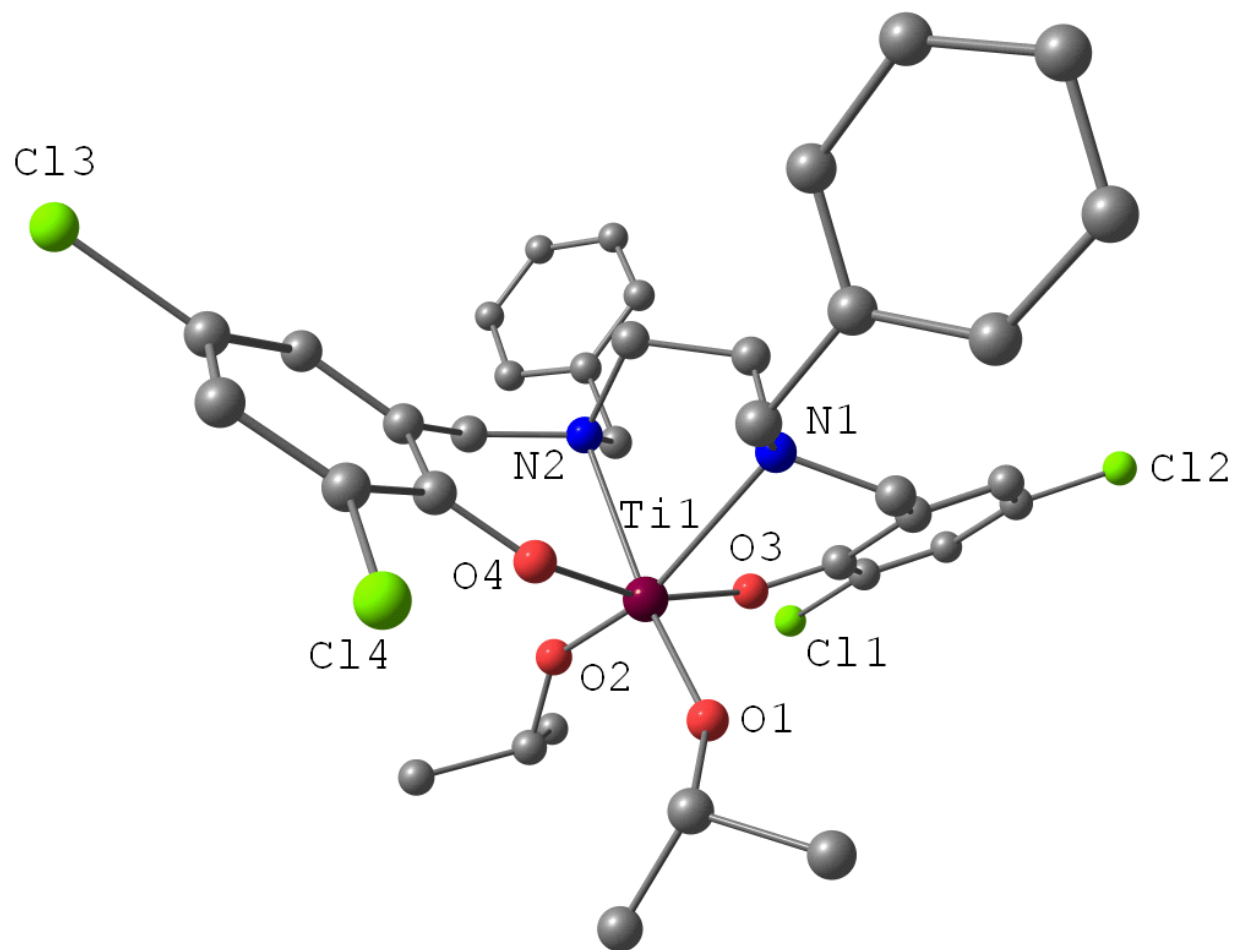

**Figure S7.** Geometry optimized structure of **4b'**. Selected bond lengths (Å) and angles (°): Ti1-O1 1.804, Ti1-O2 1.806, Ti1-O3 1.913, Ti1-O4 1.928, O3-Ti1-O4 162.9, O1-Ti1-O2 105.3, N1-Ti1-N2 74.7.



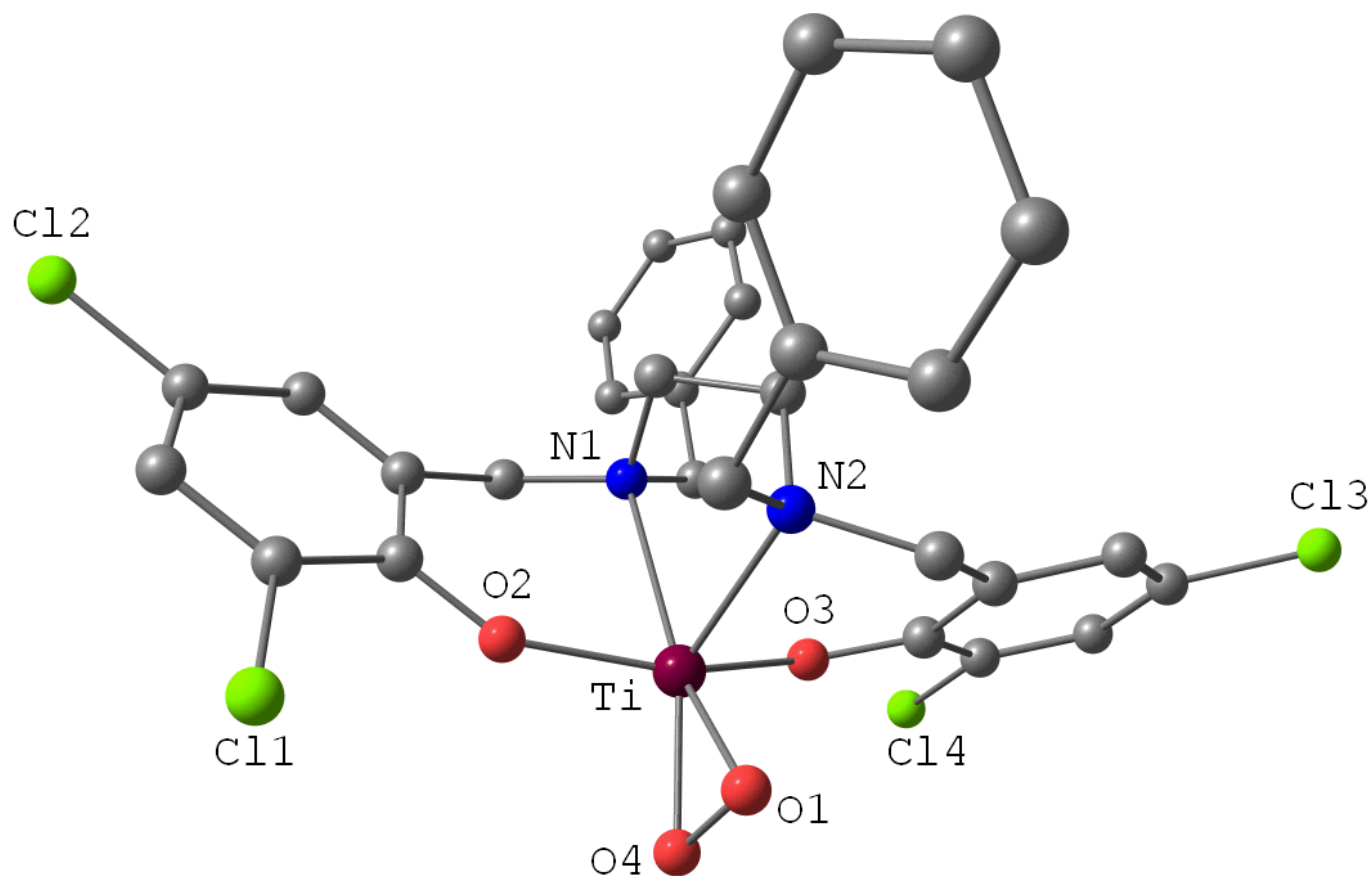

**Figure S8.** Geometry optimized structure of intermediate **4c'**. Selected bond lengths (Å) and angles (°): Ti1-O1 1.836, Ti1-O2 1.887, Ti1-O3 1.866, Ti1-O4 1.833, O1-O4 1.444, O1-Ti1-O4 46.3, O2-Ti1-O3 151.9.

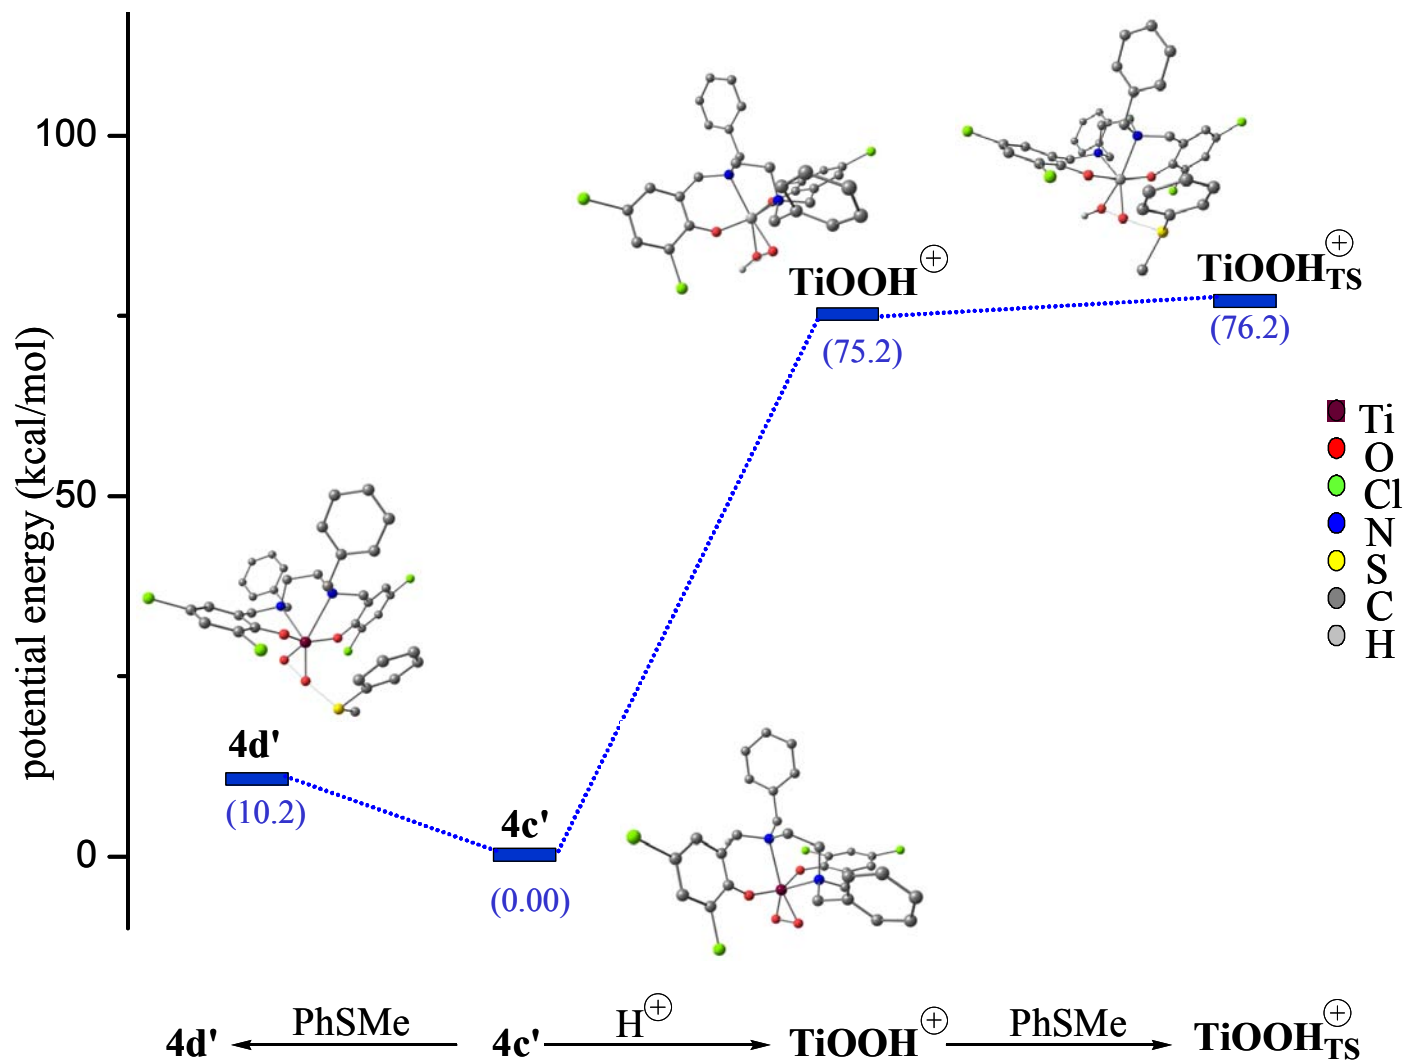

Figure S9. Comparison of the energy profiles between the peroxy and hydroperoxy pathways for the 4b precatalyst.

experimental spectrum

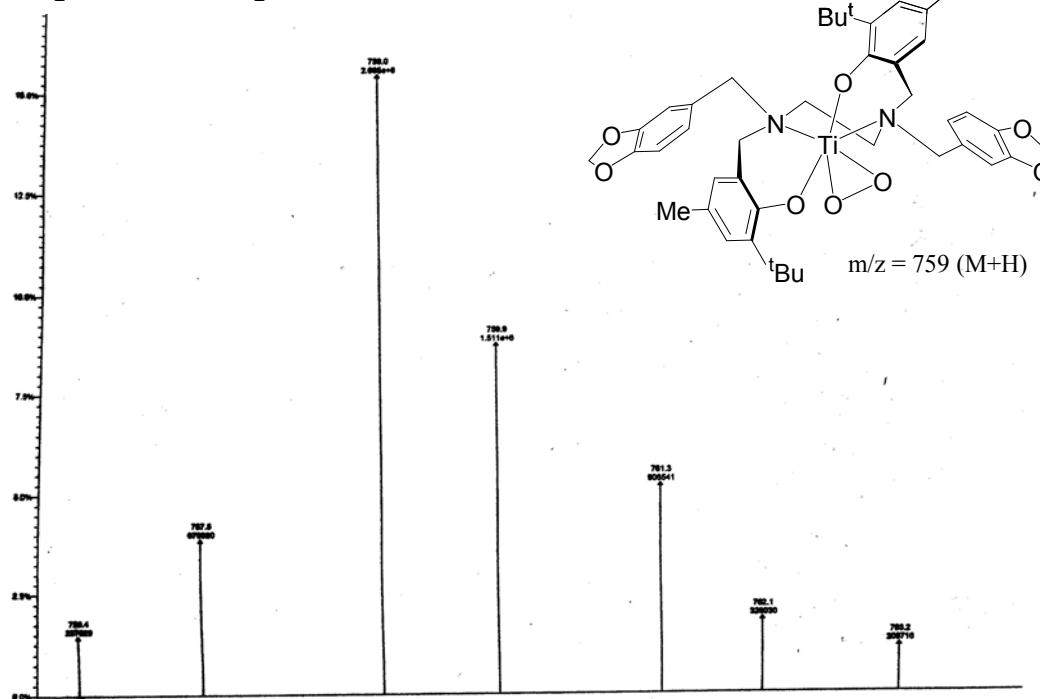

simulated spectrum

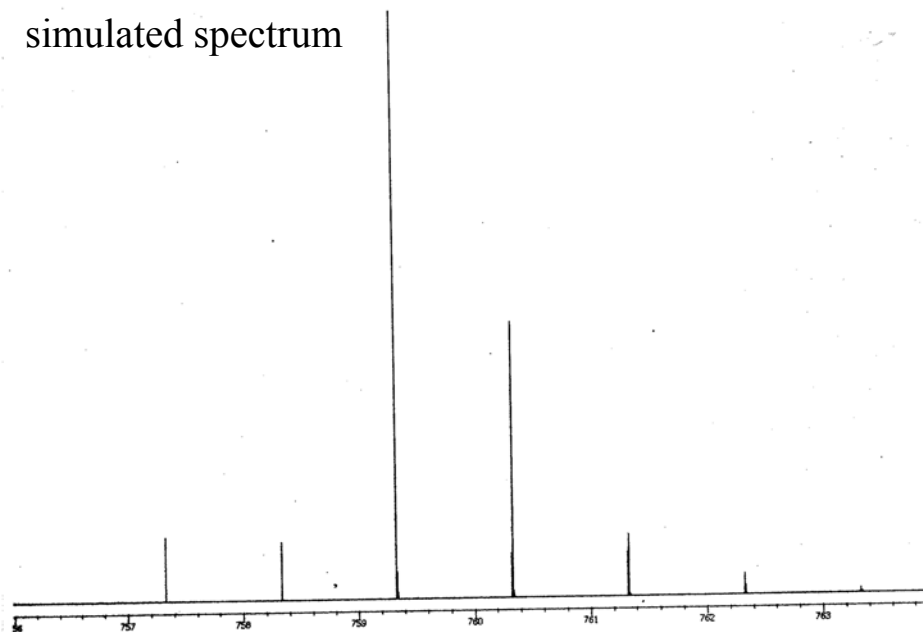

**Figure S10.** Overlay of experimental and simulated LCMS–APCI mass spectrum (in positive mode) of **1b** with H<sub>2</sub>O<sub>2</sub> in CH<sub>3</sub>CN/CHCl<sub>3</sub> showing the isotopic distribution of peroxo species of **1b**.

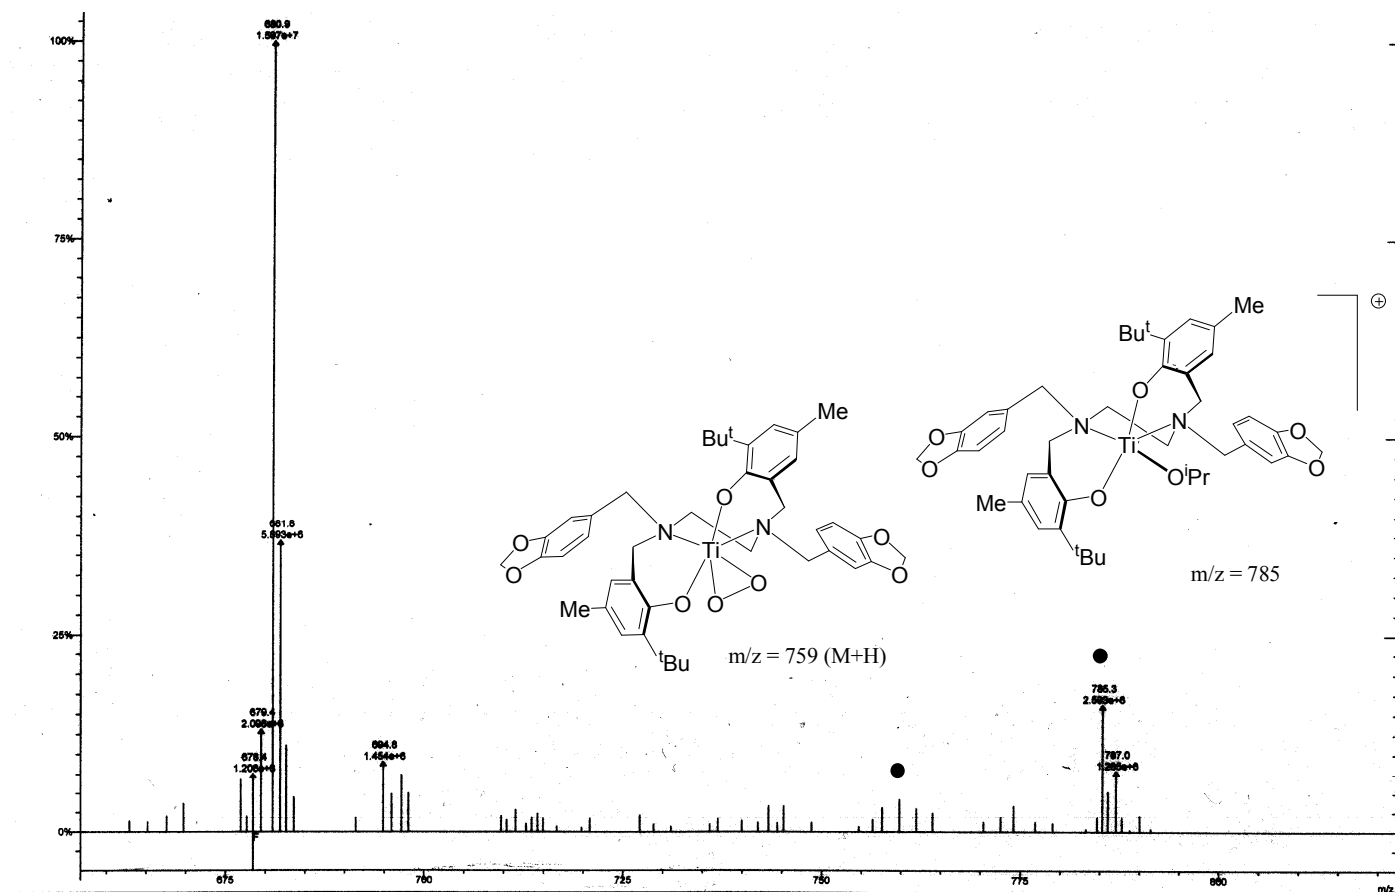

**Figure S11.** An expanded LCMS–APCI mass spectrum (in positive ion mode) of **1b** with  $\text{H}_2\text{O}_2$  in  $\text{CH}_3\text{CN}/\text{CHCl}_3$  showing the formation of peroxy species.

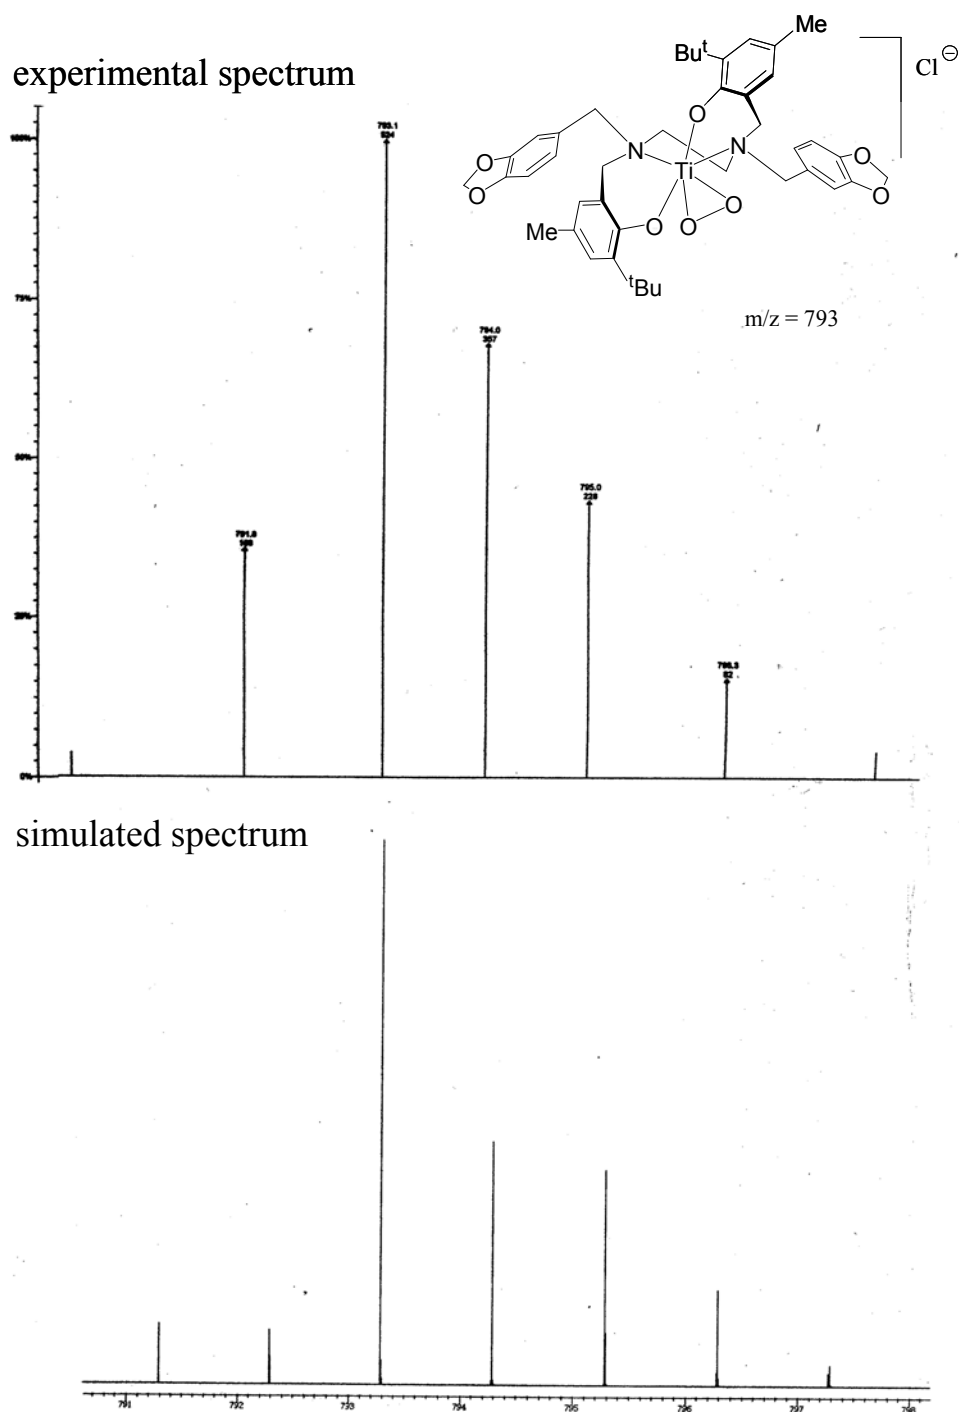

**Figure S12.** Overlay of experimental and simulated LCMS–APCI mass spectrum (in negative mode) of **1b** with  $\text{H}_2\text{O}_2$  in  $\text{CH}_3\text{CN}/\text{CHCl}_3$  showing the isotopic distribution of the chloride adduct of peroxo species of **1b**.

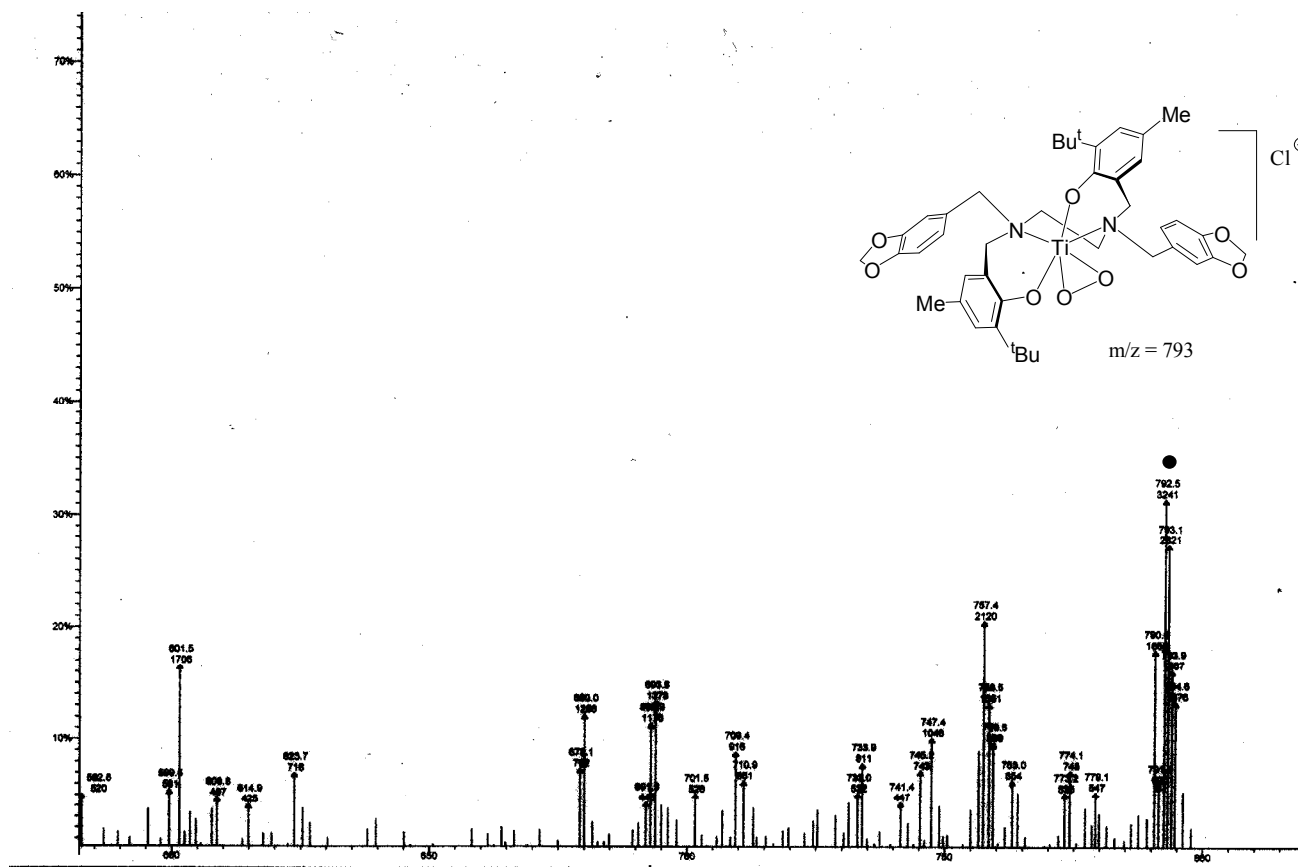

**Figure S13.** An expanded LCMS-APCI mass spectrum (in negative ion mode) of **1b** with  $\text{H}_2\text{O}_2$  in  $\text{CH}_3\text{CN}/\text{CHCl}_3$  showing the formation of peroxy species and its  $\text{Cl}^-$  adduct.

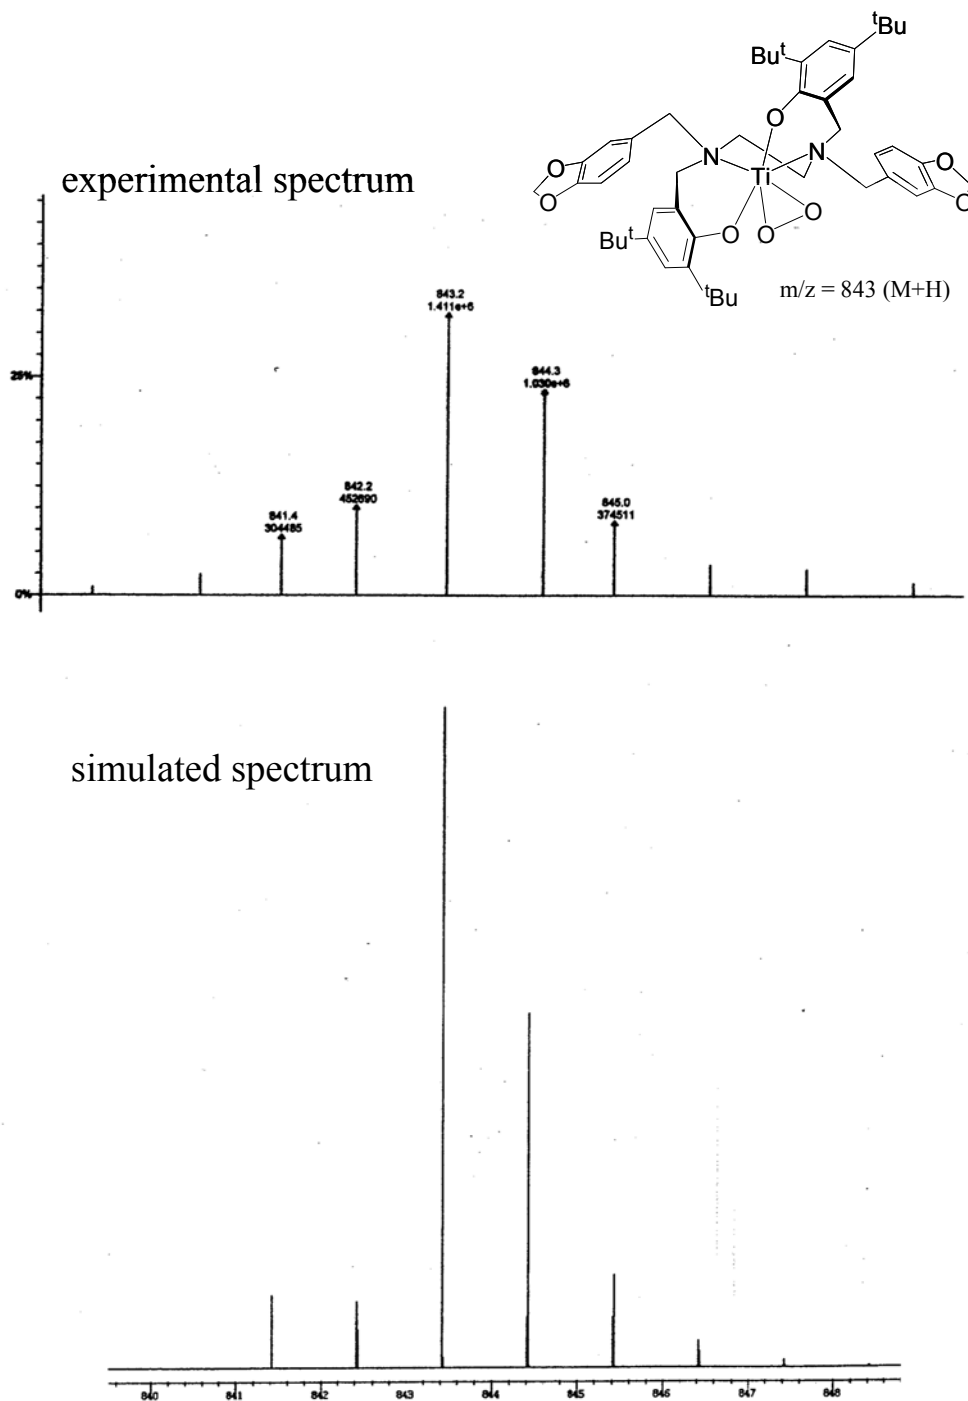

**Figure S14.** Overlay of experimental and simulated LCMS–APCI mass spectrum (in positive mode) of **2b** with H<sub>2</sub>O<sub>2</sub> in CH<sub>3</sub>CN/CHCl<sub>3</sub> showing the isotopic distribution of peroxo species of **2b**.

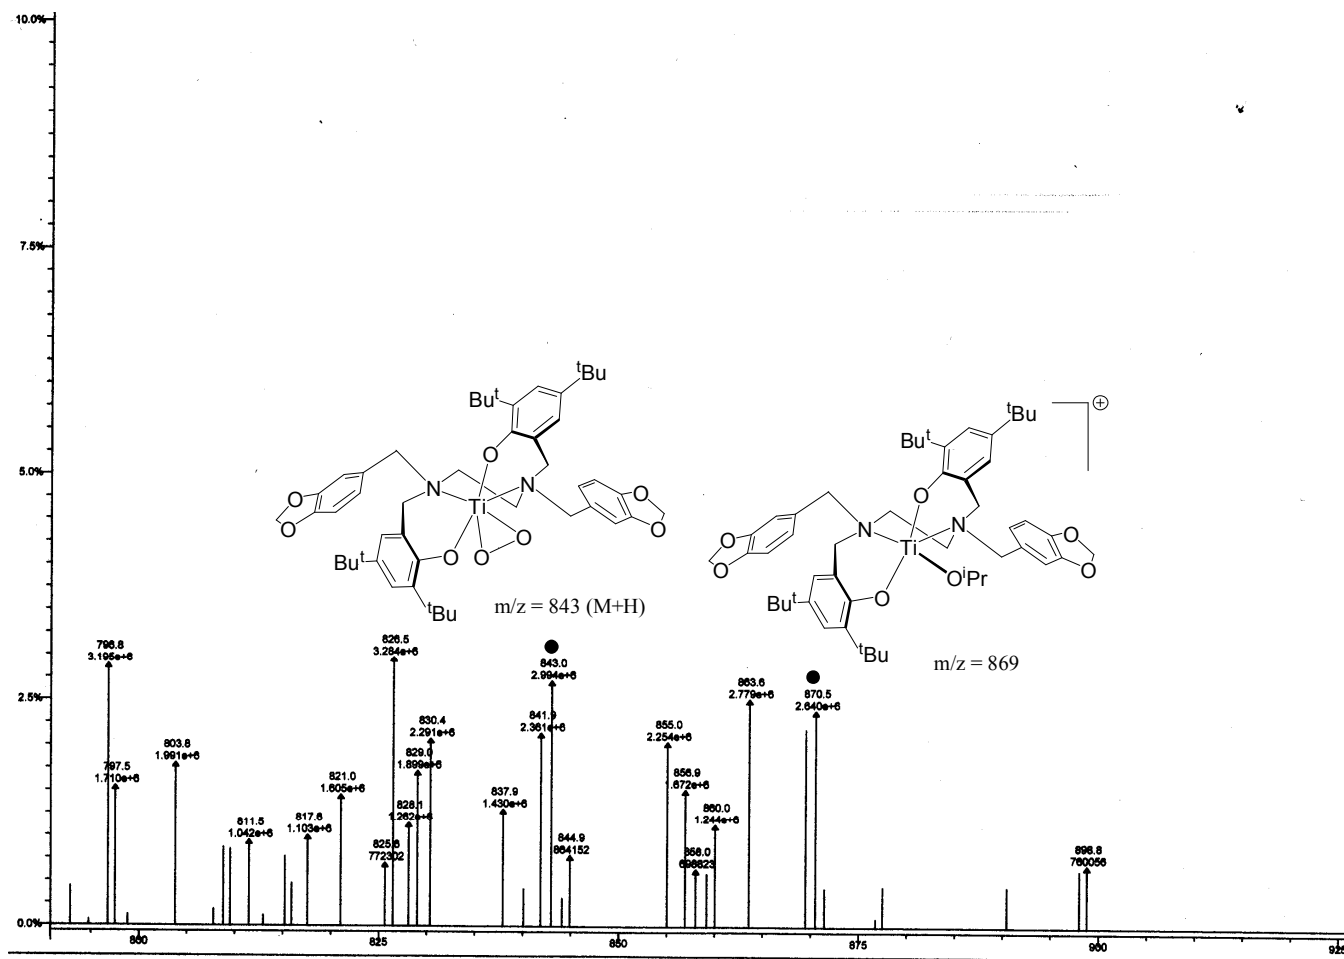

**Figure S15.** An expanded LCMS–APCI mass spectrum (in positive ion mode) of **2b** with  $H_2O_2$  in  $CH_3CN/CHCl_3$  showing the formation of peroxo species.



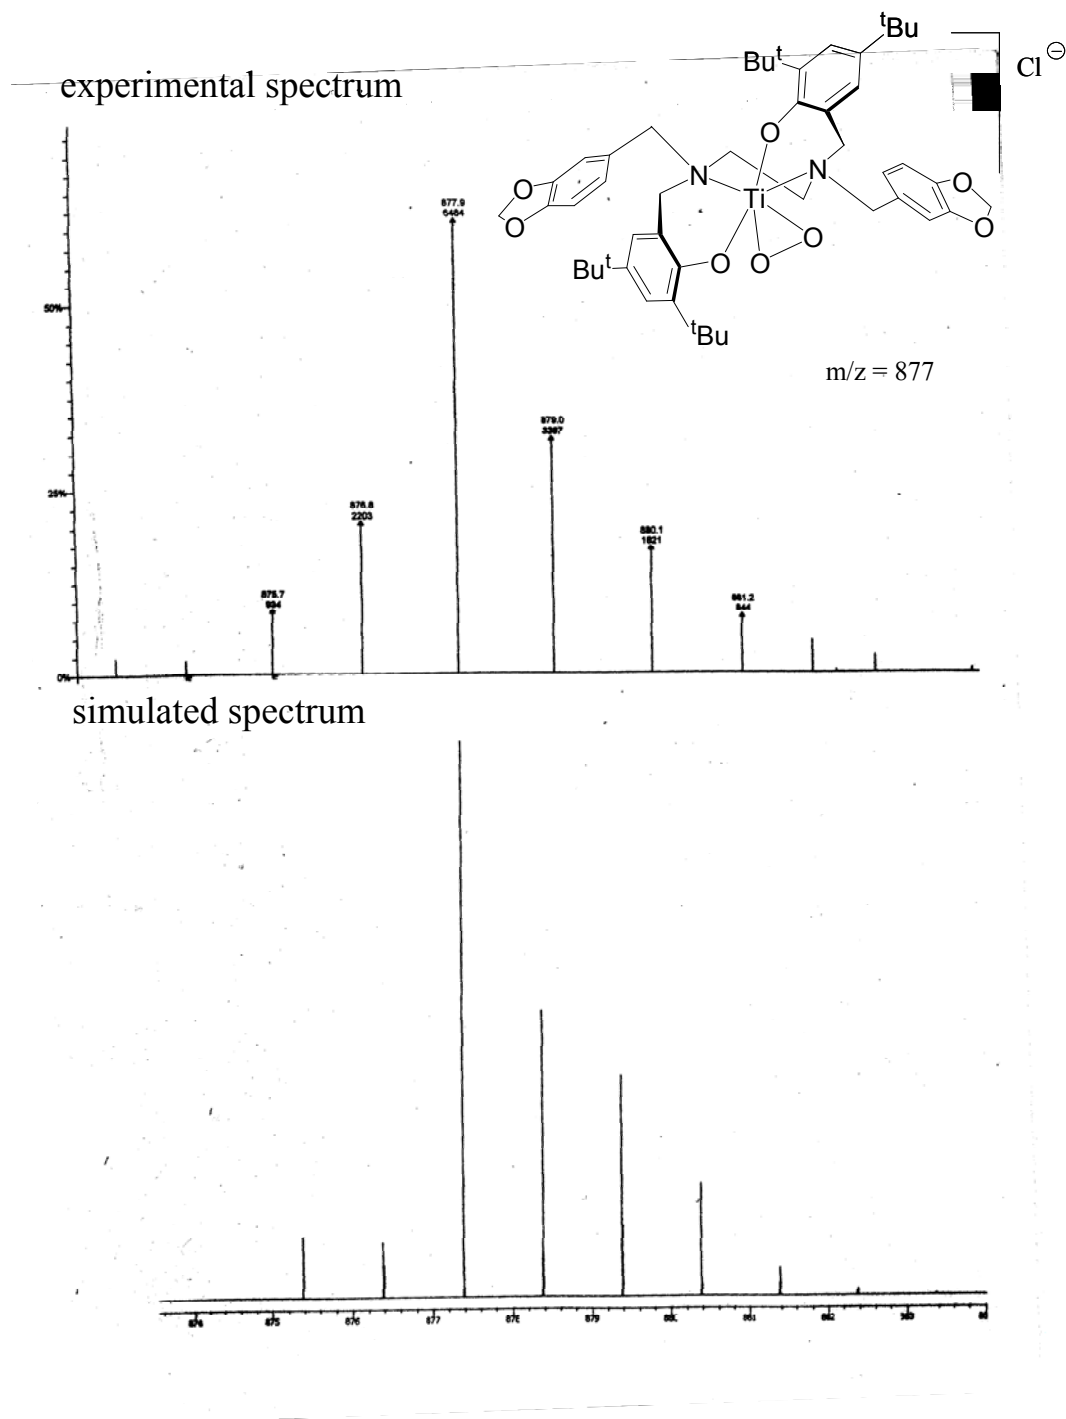

**Figure S16.** Overlay of experimental and simulated LCMS–APCI mass spectrum (in negative mode) of **2b** with  $\text{H}_2\text{O}_2$  in  $\text{CH}_3\text{CN}/\text{CHCl}_3$  showing the isotopic distribution of the chloride adduct of peroxo species of **2b**.

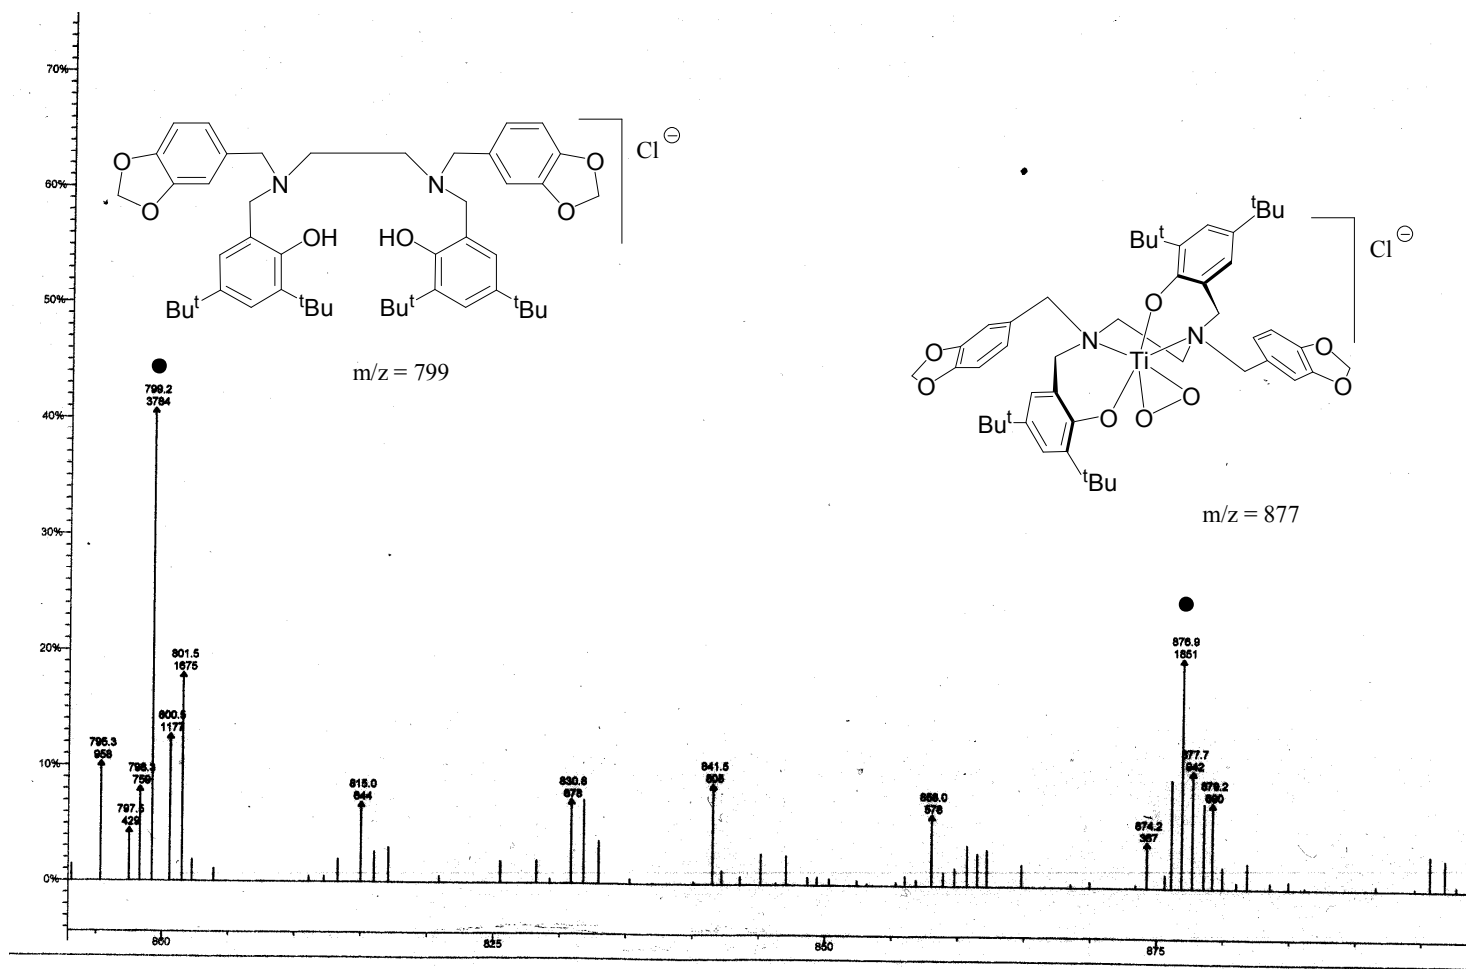

**Figure S17.** An expanded LCMS-APCI mass spectrum (in negative ion mode) of **2b** with  $\text{H}_2\text{O}_2$  in  $\text{CH}_3\text{CN}/\text{CHCl}_3$  showing the formation of peroxo species and its  $\text{Cl}^-$  adduct.

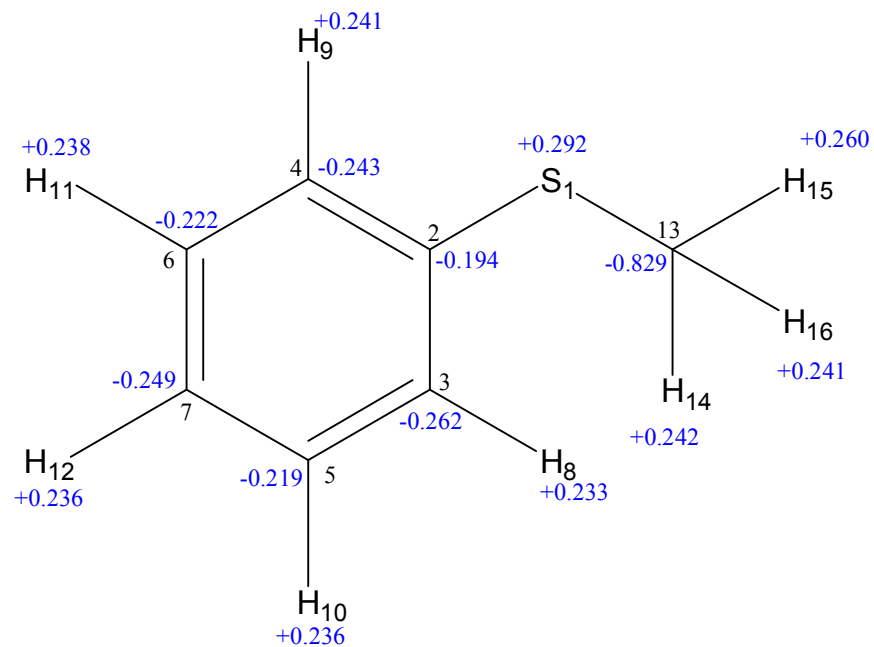

natural charges in free thioanisole

total +ve charge = 2.219

total -ve charge = 2.218

overall charge = +0.001

**Figure S18**

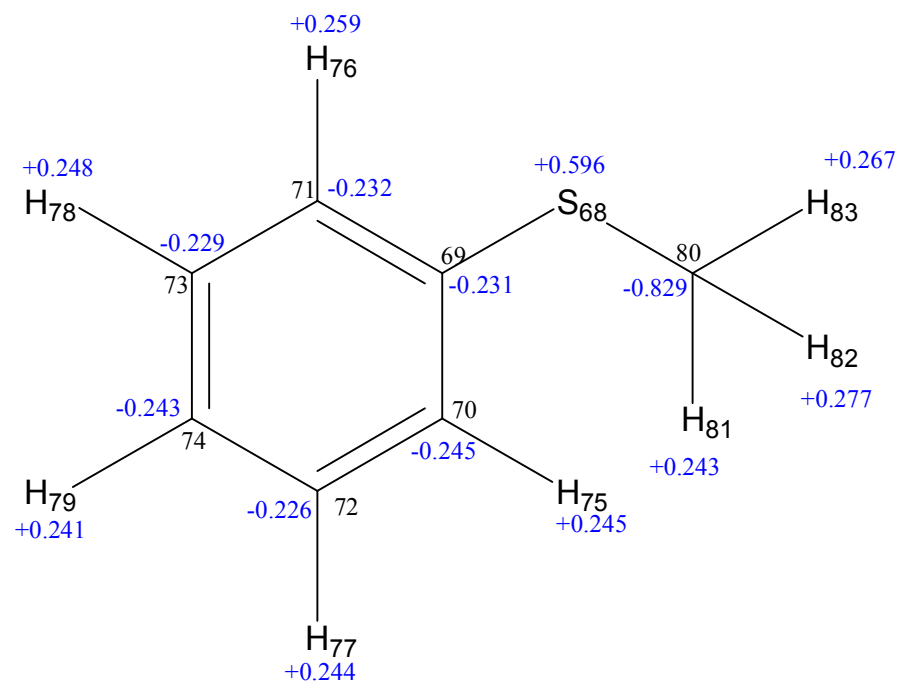

natural charge of thioanisole moiety in **4d'**

total +ve charge = 2.620

total -ve charge = 2.235

overall +ve charge = 0.385

**Figure S19.**

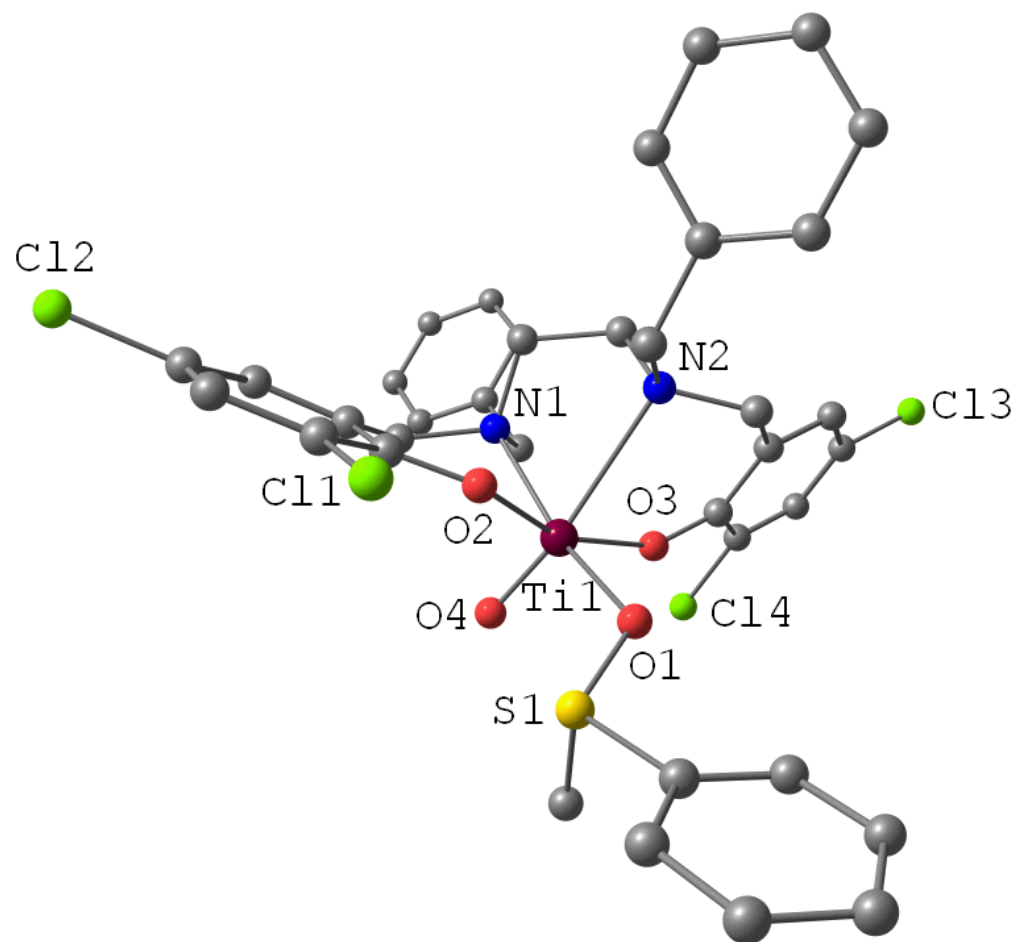

**Figure S20.** Geometry optimized structure of intermediate **4e'**. Selected bond lengths (Å) and angles (°): Ti1-O1 2.079, Ti1-O2 1.947, Ti1-O3 1.924, Ti1-O4 1.646, O1-O4 2.876, O1-S1 1.564, O1-Ti1-O4 100.5, O2-Ti1-O3 157.5, Ti1-O1-S1 117.8.

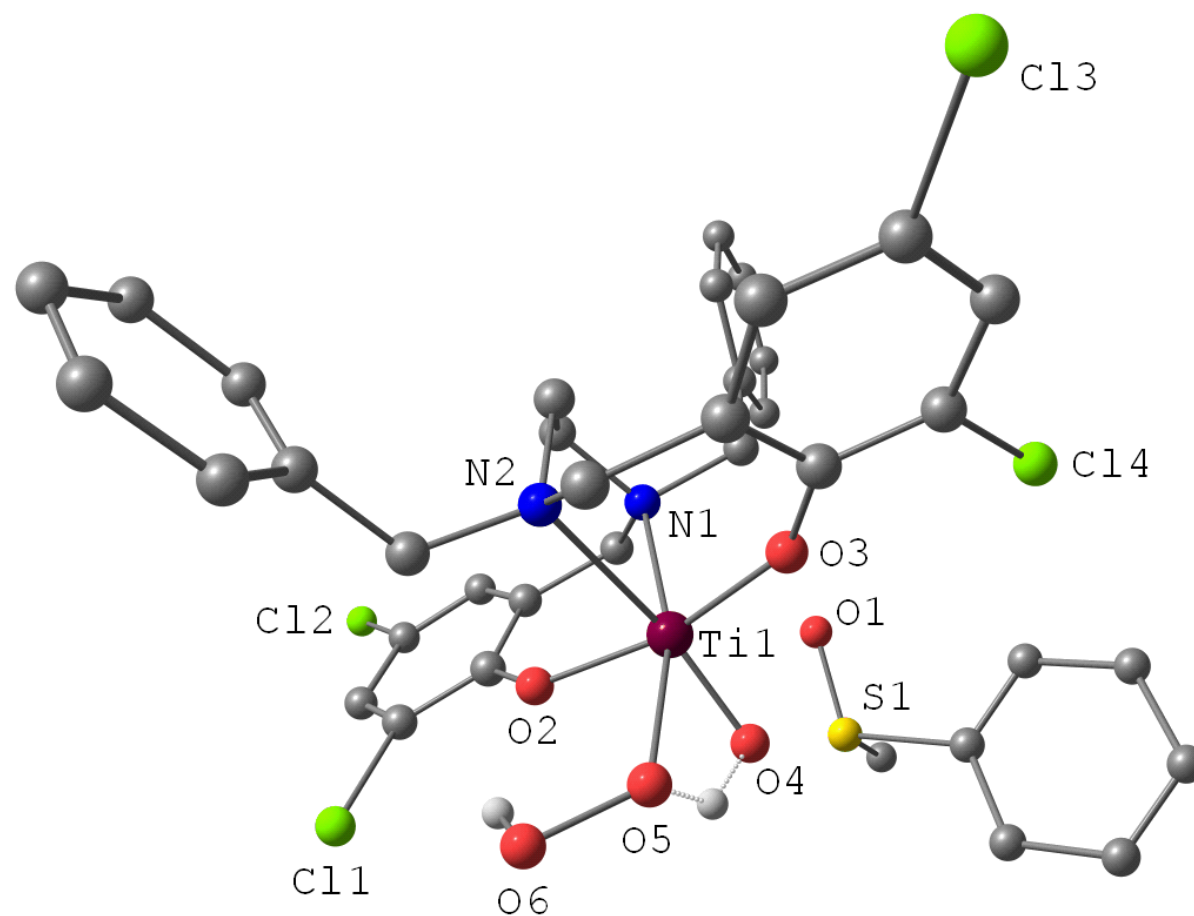

**Figure S21.** Fully optimized transition state **4f\***. Selected bond lengths (Å) and angles (°): Ti-O1 4.069, Ti-O2 1.952, Ti-O3 1.879, Ti-O4 1.729, Ti-O5 2.112, O4-S1 3.129, O2-Ti-O3 164.3, O4-Ti-O5 72.7, O5-H36-O4 135.0, H35-O6-O5 101.4.

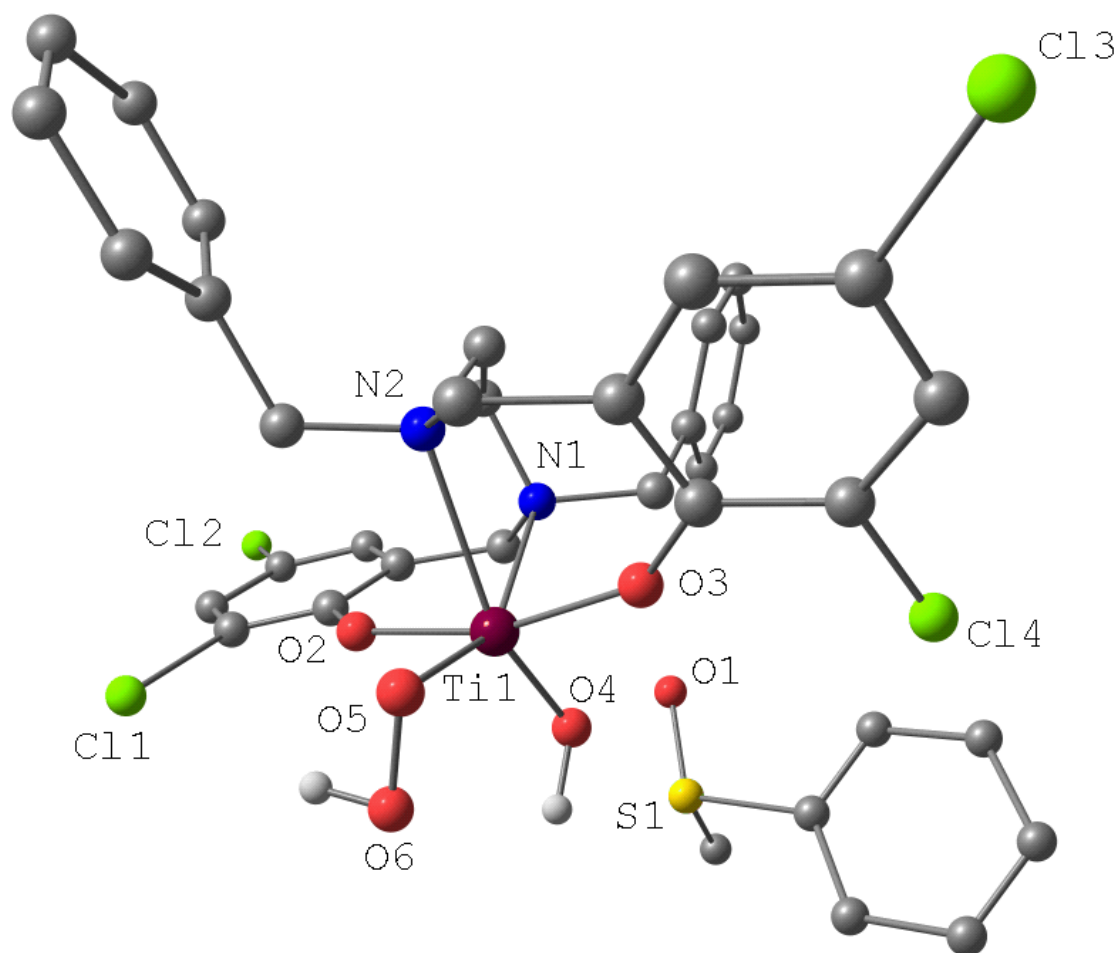

**Figure S22.** Geometry optimized structure of intermediate **4g'**. Selected bond lengths (Å) and angles (°): Ti1-O1 4.967, Ti1-O2 1.932, Ti1-O3 1.894, Ti1-O4 1.843, Ti1-O5 1.896, O1-O4 3.480, O1-S1 1.519, O2-Ti1-O3 164.8, O4-Ti1-O5 122.4.

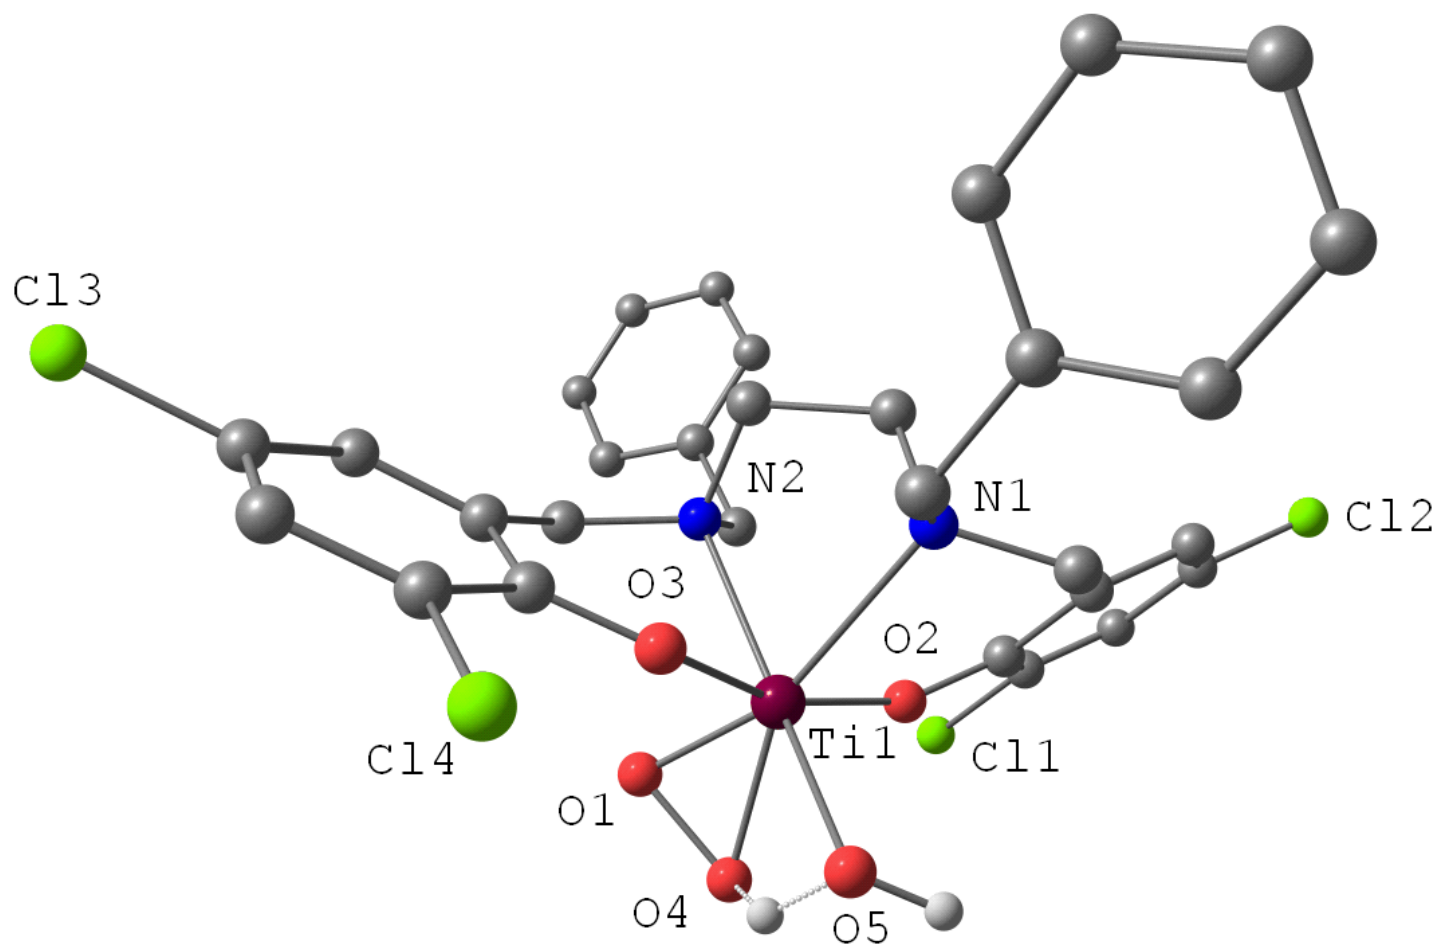

**Figure S23.** Fully optimized transition state **4h'**. Selected bond lengths (Å) and angles (°): Ti1-O1 1.852, Ti1-O2 1.886, Ti1-O3 1.904, Ti1-O4 2.062, Ti1-O5 2.061, O1-O4 1.447, O1-Ti1-O4 42.9, O2-Ti1-O3 160.7.



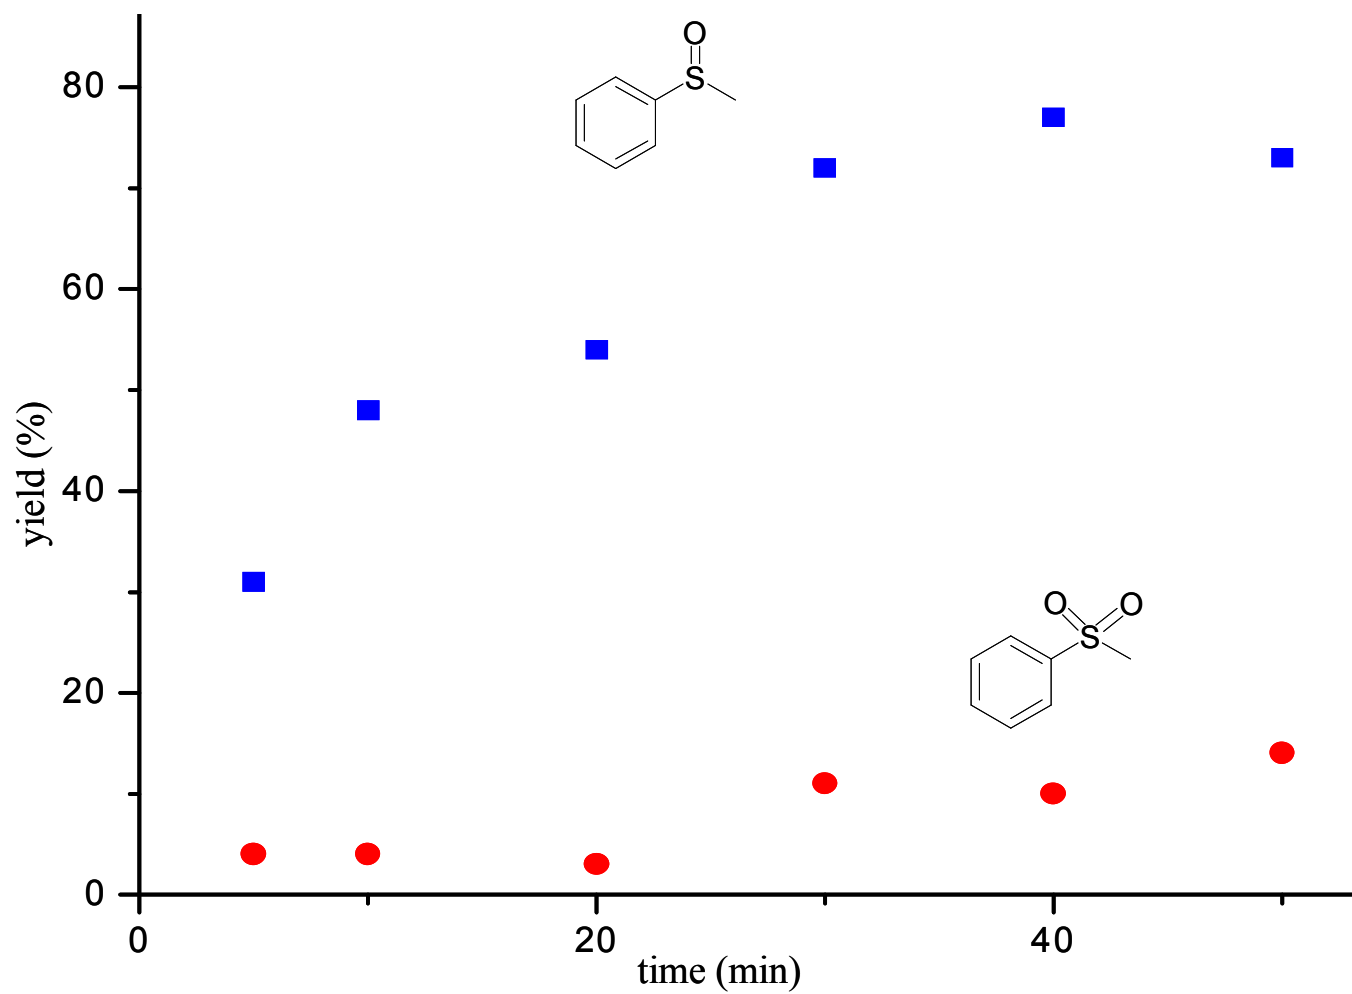

Figure S24. A time dependent profile of the oxidation of thioanisole by aqueous H<sub>2</sub>O<sub>2</sub> by **1b**.

**Table S1.** Molecular orbital Ti–O  $\pi$ -interaction in **1b'**–**4b'**.

| <b>1b'</b>                                                                        | <b>2b'</b>                                                                         | <b>3b'</b>                                                                          | <b>4b'</b>                                                                          | <b>atom legend</b>                                                                                                                                                                                                                                                                                                                                                                                                                                                                                                                                                                                                                                                                                                                                                                                                                   |
|-----------------------------------------------------------------------------------|------------------------------------------------------------------------------------|-------------------------------------------------------------------------------------|-------------------------------------------------------------------------------------|--------------------------------------------------------------------------------------------------------------------------------------------------------------------------------------------------------------------------------------------------------------------------------------------------------------------------------------------------------------------------------------------------------------------------------------------------------------------------------------------------------------------------------------------------------------------------------------------------------------------------------------------------------------------------------------------------------------------------------------------------------------------------------------------------------------------------------------|
| 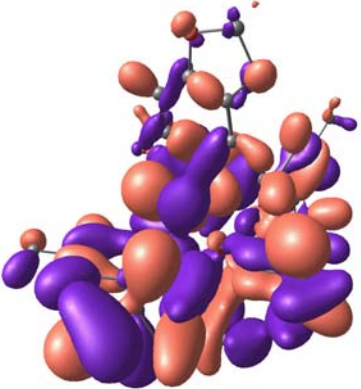 |  |  |  | <ul style="list-style-type: none"><li><span style="display: inline-block; width: 10px; height: 10px; background-color: darkpurple; margin-right: 5px;"></span> Ti</li><li><span style="display: inline-block; width: 10px; height: 10px; background-color: red; margin-right: 5px;"></span> O</li><li><span style="display: inline-block; width: 10px; height: 10px; background-color: lightgreen; margin-right: 5px;"></span> Cl</li><li><span style="display: inline-block; width: 10px; height: 10px; background-color: blue; margin-right: 5px;"></span> N</li><li><span style="display: inline-block; width: 10px; height: 10px; background-color: yellow; margin-right: 5px;"></span> S</li><li><span style="display: inline-block; width: 10px; height: 10px; background-color: gray; margin-right: 5px;"></span> C</li></ul> |
| MO 189                                                                            | MO 212                                                                             | MO 184                                                                              | MO 165                                                                              |                                                                                                                                                                                                                                                                                                                                                                                                                                                                                                                                                                                                                                                                                                                                                                                                                                      |

**Table S2.** Blank and control study of the oxidation of thioether by aqueous H<sub>2</sub>O<sub>2</sub>.

| entry | substrate                                                                           | product                                                                             | conversion <sup>a</sup> %<br>(SO:SO <sub>2</sub> ) <sup>b</sup> |                                           |
|-------|-------------------------------------------------------------------------------------|-------------------------------------------------------------------------------------|-----------------------------------------------------------------|-------------------------------------------|
|       |                                                                                     |                                                                                     | blank                                                           | Ti(O <sup><i>i</i></sup> Pr) <sub>4</sub> |
| 1.    | 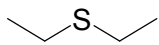   |    | 21<br>(>99:1)                                                   | 29<br>(1:2)                               |
| 2.    |    |    | 29<br>(>99:1)                                                   | 57<br>(1.5:1)                             |
| 3.    |    |    | 23<br>(>99:1)                                                   | 86<br>(7:1)                               |
| 4.    |    |    | 69<br>(>99:1)                                                   | 47<br>(1:2)                               |
| 5.    |    |    | 12<br>(>99:1)                                                   | 23<br>(2:1)                               |
| 6.    |  |  | 6<br>(>99:1)                                                    | 46<br>(7:1)                               |
| 7.    |  |  | no product                                                      | 57<br>(1:1)                               |
| 8.    |  |  | 24<br>(>99:1)                                                   | 61<br>(1:1)                               |
| 9.    |  |  | no product                                                      | 77<br>(6:1)                               |
| 10.   |  |  | no product                                                      | 20<br>(>99:1)                             |

<sup>a</sup>Reaction conditions: 2.00 mmol of substituted thioether, 2.00 mmol of H<sub>2</sub>O<sub>2</sub>, 2.00 mmol of internal standard (1,2-dichlorobenzene) and 1.00 × 10<sup>-2</sup> mmol Ti(O<sup>*i*</sup>Pr)<sub>4</sub> catalyst, in CH<sub>3</sub>OH (5 mL) at room temperature (30 minute). Products were quantified by GC analysis with respect to internal standard and identified by GCMS analysis.

<sup>b</sup>Ratio of sulfoxide to sulfone (SO:SO<sub>2</sub>) is given in parenthesis under yield.

**Table S3.** Selected results of oxidation of thianisole by different oxidants catalyzed by **1b**.

| entry | oxidant                       | sulfoxide conversion <sup>a</sup><br>(%) | product ratio<br>(SO/SO <sub>2</sub> ) <sup>b</sup> |
|-------|-------------------------------|------------------------------------------|-----------------------------------------------------|
| 1     | H <sub>2</sub> O <sub>2</sub> | 91                                       | 10:1                                                |
| 2     | TBHP <sup>c</sup>             | no product                               | -                                                   |
| 3     | <i>m</i> -CPBA <sup>d</sup>   | 52                                       | >99:1                                               |
| 4     | molecular O <sub>2</sub>      | no product                               | -                                                   |
| 5     | air                           | no product                               | -                                                   |

<sup>a</sup>Reaction conditions: 2.00 mmol of substituted thioether, 2.00 mmol of oxidant, 2.00 mmol of internal standard (1,2-dichlorobenzene) and  $1.00 \times 10^{-2}$  mmol Ti catalyst, in CH<sub>3</sub>OH (5 mL) at room temperature (30 minute). Products were quantified by GC analysis and identified by GCMS analysis.

<sup>b</sup>Ratio of sulfoxide to sulfone.

<sup>c</sup>*t*-Butyl hydroperoxide.

<sup>d</sup>*m*-Chloroperbenzoic acid.

**Table S4.** Selected results of oxidation of thianisole by aqueous H<sub>2</sub>O<sub>2</sub> catalyzed by **1b** at different catalyst loading.

| entry | catalyst loading<br>(mol %) | time<br>(min) | sulfoxide conversion <sup>a</sup><br>(%) | product ratio<br>(SO/SO <sub>2</sub> ) <sup>b</sup> |
|-------|-----------------------------|---------------|------------------------------------------|-----------------------------------------------------|
| 1     | 0.05                        | 30            | 26                                       | >99:1                                               |
| 2     | 0.10                        | 30            | 38                                       | 13:1                                                |
| 3     | 0.30                        | 30            | 59                                       | 9:1                                                 |
|       |                             | 60            | 69                                       | 14:1                                                |
| 4     | 0.50                        | 30            | 90                                       | 10:1                                                |
| 5     | 1.00                        | 30            | 73                                       | 5:1                                                 |

<sup>a</sup>Reaction conditions: 2.00 mmol of substituted thioether, 2.00 mmol of H<sub>2</sub>O<sub>2</sub>, 2.00 mmol of internal standard (1,2-dichlorobenzene) and  $(0.05-1.00) \times 10^{-2}$  mmol Ti catalyst, in CH<sub>3</sub>OH (5 mL) at room temperature (30–60 minutes). Products were quantified by GC analysis with respect to internal standard and identified by GCMS analysis.

<sup>b</sup>Ratio of sulfoxide to sulfone.

**Table S5.** Isolated yield of oxidation of thioethers by aqueous H<sub>2</sub>O<sub>2</sub> catalyzed by **2b**.

| entry | substrate                                                                           | product                                                                              | isolated yield (%) <sup>a</sup> |
|-------|-------------------------------------------------------------------------------------|--------------------------------------------------------------------------------------|---------------------------------|
| 1.    | 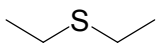   |     | 85                              |
| 2.    |    |    | 80                              |
| 3.    |    |     | 78                              |
| 4.    |    |    | 87                              |
| 5.    |    |     | 90                              |
| 6.    |   |   | 92                              |
| 7.    |  |   | 82                              |
| 8.    |  |  | 84                              |
| 9.    |  |  | 20                              |
| 10.   |  |  | 10                              |

<sup>a</sup>Reaction conditions: 2.00 mmol of substituted thioether, 2.00 mmol of H<sub>2</sub>O<sub>2</sub> and 1.00 × 10<sup>-2</sup> mmol Ti catalyst, in CH<sub>3</sub>OH (5 mL) at room temperature (30 minute). Products were identified by GCMS and <sup>1</sup>H NMR after isolation.

**Table S6.** Selected results of oxidation of thianisole by aqueous H<sub>2</sub>O<sub>2</sub> catalyzed by **1b** in different solvents.

| entry | catalyst loading<br>(mol %) | time<br>(min) | sulfoxide conversion <sup>a</sup><br>(%) | product ratio<br>(SO/SO <sub>2</sub> ) <sup>b</sup> |
|-------|-----------------------------|---------------|------------------------------------------|-----------------------------------------------------|
| 1     | methanol                    | 30            | 90                                       | 10:1                                                |
| 2     | dichloromethane             | 30            | 48                                       | 9:1                                                 |
|       |                             | 60            | 71                                       | 6:1                                                 |
|       |                             | 90            | 84                                       | 8:1                                                 |
| 3     | acetonitrile                | 30            | 30                                       | 7:1                                                 |
| 4     | tetrahydrofuran             | 30            | 16                                       | 5:1                                                 |
| 5     | benzene                     | 30            | 31                                       | 1:1                                                 |

<sup>a</sup>Reaction conditions: 2.00 mmol of substituted thioether, 2.00 mmol of H<sub>2</sub>O<sub>2</sub>, 2.00 mmol of internal standard (1,2-dichlorobenzene) and  $1.00 \times 10^{-2}$  mmol Ti catalyst, in different solvents (5 mL) at room temperature (30–90 minutes). Products were quantified by GC analysis with respect to internal standard and identified by GCMS analysis.

<sup>b</sup>Ratio of sulfoxide to sulfone.

**Table S7.** Geometry optimized coordinates of **1b'** at the B3LYP/LANL2DZ, 6-31G(d) level of theory.

E = -2637.1957473 Hartree/particle

|    |          |          |          |
|----|----------|----------|----------|
| Ti | 9.486912 | 8.140676 | 4.946834 |
| O  | 10.93205 | 9.360747 | 5.110948 |
| O  | 8.536955 | 8.841393 | 6.340052 |
| O  | 5.25217  | 11.6206  | -0.9151  |
| O  | 4.470144 | 13.56542 | 0.075712 |
| O  | 8.035812 | 7.048081 | 4.403635 |
| O  | 10.48531 | 6.757156 | 5.597472 |
| O  | 14.02038 | 4.714574 | -0.6691  |
| O  | 14.36986 | 6.403057 | -2.22079 |
| N  | 8.715194 | 9.984776 | 3.454136 |
| N  | 10.16722 | 7.576211 | 2.610352 |
| C  | 11.40505 | 10.59031 | 4.865938 |
| C  | 12.75109 | 10.9421  | 5.184504 |
| C  | 13.17754 | 12.22378 | 4.816848 |
| H  | 14.19908 | 12.51859 | 5.031295 |
| C  | 12.35667 | 13.16813 | 4.185622 |
| C  | 11.03082 | 12.81332 | 3.947081 |
| H  | 10.35322 | 13.53328 | 3.4903   |
| C  | 10.54193 | 11.55011 | 4.29165  |
| C  | 13.67881 | 9.995614 | 5.979125 |
| C  | 13.0587  | 9.745111 | 7.375805 |
| H  | 12.95724 | 10.68548 | 7.931181 |
| H  | 13.70191 | 9.075018 | 7.960767 |
| H  | 12.07296 | 9.283416 | 7.290262 |
| C  | 13.86962 | 8.640418 | 5.259685 |
| H  | 12.93285 | 8.085314 | 5.20735  |
| H  | 14.5988  | 8.030774 | 5.808815 |
| H  | 14.25661 | 8.785624 | 4.243325 |
| C  | 15.08104 | 10.60259 | 6.194344 |
| H  | 15.59939 | 10.78949 | 5.246219 |
| H  | 15.69199 | 9.898013 | 6.769838 |
| H  | 15.0466  | 11.54164 | 6.758212 |
| C  | 12.89962 | 14.51982 | 3.78163  |
| H  | 13.54727 | 14.44956 | 2.896833 |
| H  | 13.50031 | 14.96971 | 4.581418 |
| H  | 12.09123 | 15.21793 | 3.538908 |
| C  | 8.739905 | 9.66363  | 7.477795 |
| H  | 9.524848 | 10.39805 | 7.239223 |
| C  | 7.437455 | 10.40504 | 7.794582 |
| H  | 7.116856 | 11.02025 | 6.946474 |
| H  | 7.566458 | 11.0619  | 8.663103 |



|   |          |          |          |
|---|----------|----------|----------|
| H | 6.638422 | 9.687999 | 8.014693 |
| C | 9.209892 | 8.819481 | 8.664294 |
| H | 8.449002 | 8.075286 | 8.926414 |
| H | 9.391497 | 9.454618 | 9.539918 |
| H | 10.13648 | 8.293157 | 8.418616 |
| C | 9.066139 | 11.26722 | 4.130329 |
| H | 8.584531 | 11.22551 | 5.113485 |
| H | 8.61583  | 12.10691 | 3.584323 |
| C | 7.221401 | 9.862669 | 3.349107 |
| H | 6.852772 | 9.884197 | 4.376466 |
| H | 7.004758 | 8.865486 | 2.965192 |
| C | 6.488613 | 10.89886 | 2.512684 |
| C | 6.260679 | 10.66105 | 1.135931 |
| H | 6.594693 | 9.746467 | 0.656335 |
| C | 5.574084 | 11.62113 | 0.421242 |
| C | 5.102554 | 12.78926 | 1.015869 |
| C | 5.292179 | 13.04406 | 2.35929  |
| H | 4.909932 | 13.94682 | 2.823195 |
| C | 5.992461 | 12.07185 | 3.096757 |
| H | 6.13673  | 12.23287 | 4.161446 |
| C | 4.426486 | 12.77315 | -1.11688 |
| H | 3.392256 | 12.45473 | -1.30734 |
| H | 4.81575  | 13.35736 | -1.95609 |
| C | 9.393463 | 9.888161 | 2.141946 |
| H | 10.40031 | 10.2915  | 2.2692   |
| H | 8.897798 | 10.51719 | 1.388787 |
| C | 9.461598 | 8.452393 | 1.647787 |
| H | 8.455714 | 8.047309 | 1.51764  |
| H | 9.94255  | 8.424391 | 0.659586 |
| C | 11.6593  | 7.74314  | 2.558658 |
| H | 12.05312 | 7.108584 | 3.355333 |
| H | 11.87527 | 8.771056 | 2.849315 |
| C | 12.36012 | 7.426792 | 1.247991 |
| C | 12.8238  | 6.115174 | 0.987346 |
| H | 12.69367 | 5.315756 | 1.709496 |
| C | 13.47073 | 5.887122 | -0.20948 |
| C | 13.68315 | 6.901023 | -1.14124 |
| C | 13.26198 | 8.194937 | -0.90982 |
| H | 13.4475  | 8.987006 | -1.62709 |
| C | 12.59732 | 8.437409 | 0.306714 |
| H | 12.27606 | 9.451841 | 0.527363 |
| C | 14.49606 | 4.994531 | -1.99036 |
| H | 15.54933 | 4.706354 | -2.06716 |
| H | 13.88706 | 4.447986 | -2.72299 |
| C | 9.809548 | 6.148802 | 2.37259  |
| H | 10.33215 | 5.576472 | 3.147357 |

|   |          |          |          |
|---|----------|----------|----------|
| H | 10.2122  | 5.823373 | 1.403767 |
| C | 8.334184 | 5.821364 | 2.398293 |
| C | 7.798861 | 5.028551 | 1.379492 |
| H | 8.437499 | 4.74118  | 0.545464 |
| C | 6.476117 | 4.592737 | 1.417726 |
| C | 5.707681 | 4.948797 | 2.534187 |
| H | 4.689731 | 4.577157 | 2.575517 |
| C | 6.18213  | 5.74192  | 3.585946 |
| C | 7.521001 | 6.223882 | 3.481477 |
| C | 5.882661 | 3.766655 | 0.299421 |
| H | 5.259026 | 2.952209 | 0.686948 |
| H | 6.664063 | 3.320577 | -0.32541 |
| H | 5.244934 | 4.372235 | -0.35943 |
| C | 5.315084 | 5.997496 | 4.839467 |
| C | 3.910306 | 5.372319 | 4.711439 |
| H | 3.342605 | 5.799442 | 3.876102 |
| H | 3.344892 | 5.570522 | 5.629013 |
| H | 3.949526 | 4.284989 | 4.580402 |
| C | 5.12637  | 7.508209 | 5.109479 |
| H | 6.073973 | 7.984573 | 5.362142 |
| H | 4.437123 | 7.649109 | 5.952236 |
| H | 4.692842 | 8.013645 | 4.237456 |
| C | 6.005876 | 5.348783 | 6.064198 |
| H | 6.11251  | 4.266324 | 5.923378 |
| H | 5.406199 | 5.514629 | 6.968539 |
| H | 6.996208 | 5.77876  | 6.227253 |
| C | 10.33501 | 5.402141 | 5.987776 |
| H | 9.542102 | 4.950002 | 5.371586 |
| C | 11.65232 | 4.662305 | 5.734725 |
| H | 11.93994 | 4.717186 | 4.678904 |
| H | 11.56226 | 3.604591 | 6.009474 |
| H | 12.45722 | 5.109935 | 6.328784 |
| C | 9.916278 | 5.314224 | 7.456962 |
| H | 10.68769 | 5.753316 | 8.100186 |
| H | 9.772235 | 4.267823 | 7.752703 |
| H | 8.979732 | 5.853296 | 7.623867 |

**Table S8.** Geometry optimized coordinates of **2b'** at the B3LYP/LANL2DZ, 6-31G(d)

level of theory.

E = -2873.0655316 Hartree/particle

|    |          |          |          |
|----|----------|----------|----------|
| Ti | 0.014379 | 1.188352 | 11.75125 |
| O  | -1.7347  | 0.787137 | 12.37973 |

|   |          |          |          |
|---|----------|----------|----------|
| O | 1.831901 | 1.148051 | 11.17801 |
| O | 0.33388  | 2.27316  | 13.17719 |
| O | -0.50793 | 2.298215 | 10.40619 |
| O | 0.063957 | -4.96052 | 5.419045 |
| O | 1.44493  | -5.26991 | 7.256396 |
| O | -0.51248 | -5.76465 | 15.74922 |
| O | 0.918676 | -5.45934 | 17.54871 |
| N | -0.5249  | -0.771   | 10.36093 |
| N | 0.858046 | -0.83986 | 12.96486 |
| C | -2.8975  | 0.187473 | 12.09832 |
| C | -4.02433 | 0.326672 | 12.96311 |
| C | -5.16909 | -0.41027 | 12.64372 |
| H | -6.02729 | -0.32833 | 13.29899 |
| C | -5.28402 | -1.25066 | 11.52367 |
| C | -4.18389 | -1.30887 | 10.66905 |
| H | -4.21907 | -1.91415 | 9.768455 |
| C | -3.01014 | -0.59156 | 10.92642 |
| C | -4.0184  | 1.30482  | 14.15995 |
| C | -2.91699 | 0.942457 | 15.18279 |
| H | -3.0302  | -0.09079 | 15.53412 |
| H | -2.98923 | 1.602113 | 16.05727 |
| H | -1.92536 | 1.061741 | 14.74686 |
| C | -3.77202 | 2.742941 | 13.64015 |
| H | -2.80576 | 2.818955 | 13.13706 |
| H | -3.77946 | 3.452619 | 14.47768 |
| H | -4.55937 | 3.043062 | 12.93796 |
| C | -5.36404 | 1.309522 | 14.91536 |
| H | -6.2006  | 1.604595 | 14.27163 |
| H | -5.31118 | 2.033819 | 15.73605 |
| H | -5.59572 | 0.331998 | 15.3549  |
| C | -6.58555 | -2.03709 | 11.28269 |
| C | -7.76892 | -1.05228 | 11.1252  |
| H | -7.90226 | -0.43069 | 12.01694 |
| H | -8.70534 | -1.59919 | 10.9569  |
| H | -7.60782 | -0.38226 | 10.27278 |
| C | -6.85756 | -2.9716  | 12.48591 |
| H | -6.04084 | -3.69157 | 12.61431 |
| H | -7.78703 | -3.53489 | 12.33362 |
| H | -6.9571  | -2.41151 | 13.42176 |
| C | -6.51628 | -2.90552 | 10.01178 |
| H | -6.36515 | -2.29913 | 9.111169 |
| H | -7.4569  | -3.45418 | 9.885751 |
| H | -5.70773 | -3.64378 | 10.06623 |
| C | -1.92361 | -0.59203 | 9.873667 |
| H | -2.15808 | -1.37796 | 9.14356  |
| H | -1.92732 | 0.363037 | 9.337356 |

|   |          |          |          |
|---|----------|----------|----------|
| C | -0.41461 | -2.00128 | 11.178   |
| H | -0.42693 | -2.90023 | 10.54542 |
| H | -1.30657 | -2.04805 | 11.80637 |
| C | 0.836939 | -1.9974  | 12.04237 |
| H | 0.910116 | -2.94728 | 12.5908  |
| H | 1.730326 | -1.93113 | 11.41745 |
| C | 0.414604 | -0.75791 | 9.187906 |
| H | 1.429496 | -0.76047 | 9.585666 |
| H | 0.270867 | 0.214434 | 8.712338 |
| C | 0.26842  | -1.86366 | 8.15548  |
| C | 1.001806 | -3.06582 | 8.29938  |
| H | 1.675037 | -3.22165 | 9.136229 |
| C | 0.854828 | -4.03041 | 7.323771 |
| C | 1.057336 | -5.81914 | 5.991866 |
| H | 1.931108 | -5.86229 | 5.327399 |
| H | 0.632744 | -6.81646 | 6.142812 |
| C | 0.026525 | -3.84512 | 6.21928  |
| C | -0.68885 | -2.67817 | 6.039775 |
| H | -1.3211  | -2.53029 | 5.171065 |
| C | -0.548   | -1.68904 | 7.030375 |
| H | -1.0811  | -0.75061 | 6.906471 |
| C | -0.03307 | -1.03327 | 14.15831 |
| H | -1.05334 | -1.12172 | 13.78562 |
| H | 0.011425 | -0.09352 | 14.71315 |
| C | 0.275631 | -2.1955  | 15.08799 |
| C | 1.123297 | -2.02655 | 16.19077 |
| H | 1.560737 | -1.04941 | 16.3754  |
| C | 1.416823 | -3.07312 | 17.08391 |
| H | 2.067539 | -2.92821 | 17.93941 |
| C | 0.824451 | -4.29375 | 16.82903 |
| C | 0.176291 | -6.43667 | 16.80983 |
| H | 0.867473 | -7.1781  | 16.38632 |
| H | -0.55221 | -6.91626 | 17.47098 |
| C | -0.03359 | -4.47644 | 15.74709 |
| C | -0.33332 | -3.45457 | 14.86948 |
| H | -1.03108 | -3.61167 | 14.05307 |
| C | 2.247114 | -0.54863 | 13.41936 |
| H | 2.601073 | -1.35867 | 14.07132 |
| H | 2.173024 | 0.353058 | 14.03905 |
| C | 3.273738 | -0.33857 | 12.33123 |
| C | 3.042727 | 0.589324 | 11.29387 |
| C | 4.102683 | 0.922816 | 10.39886 |
| C | 5.304268 | 0.221493 | 10.5445  |
| H | 6.112375 | 0.450998 | 9.861076 |
| C | 5.537501 | -0.75974 | 11.52297 |
| C | 4.499598 | -1.00663 | 12.42144 |

|   |          |          |          |
|---|----------|----------|----------|
| H | 4.625122 | -1.72571 | 13.2255  |
| C | 3.971687 | 2.067928 | 9.369954 |
| C | 2.811271 | 1.818951 | 8.378754 |
| H | 2.938673 | 0.862279 | 7.856937 |
| H | 2.796155 | 2.612402 | 7.620479 |
| H | 1.848673 | 1.818555 | 8.89048  |
| C | 3.713527 | 3.39263  | 10.12976 |
| H | 2.792844 | 3.334038 | 10.7143  |
| H | 3.619587 | 4.224592 | 9.419836 |
| H | 4.544475 | 3.620522 | 10.80849 |
| C | 5.256319 | 2.25363  | 8.535566 |
| H | 6.12572  | 2.495327 | 9.157676 |
| H | 5.112723 | 3.085873 | 7.837077 |
| H | 5.494831 | 1.36369  | 7.940925 |
| C | 6.893071 | -1.48725 | 11.57704 |
| C | 8.027312 | -0.46233 | 11.81713 |
| H | 7.884675 | 0.061609 | 12.76935 |
| H | 8.067822 | 0.292305 | 11.02456 |
| H | 9.001458 | -0.96667 | 11.84809 |
| C | 7.143026 | -2.21873 | 10.23633 |
| H | 8.108872 | -2.73934 | 10.25584 |
| H | 7.156486 | -1.52335 | 9.390407 |
| H | 6.359941 | -2.96159 | 10.04456 |
| C | 6.948072 | -2.53289 | 12.70762 |
| H | 7.922361 | -3.03523 | 12.70137 |
| H | 6.177717 | -3.30344 | 12.58739 |
| H | 6.820736 | -2.07359 | 13.69469 |
| C | 1.323338 | 3.145317 | 13.69516 |
| H | 2.305271 | 2.815897 | 13.32177 |
| C | 1.312125 | 3.065893 | 15.22452 |
| H | 0.333145 | 3.368998 | 15.61269 |
| H | 2.077299 | 3.72456  | 15.65233 |
| H | 1.511563 | 2.044491 | 15.56688 |
| C | 1.065503 | 4.571921 | 13.20262 |
| H | 1.085173 | 4.610434 | 12.10956 |
| H | 1.830932 | 5.257634 | 13.58576 |
| H | 0.083682 | 4.919647 | 13.54454 |
| C | -1.26125 | 3.485445 | 10.20815 |
| H | -1.40275 | 3.967919 | 11.18689 |
| C | -0.46805 | 4.429105 | 9.300363 |
| H | 0.513445 | 4.649387 | 9.73154  |
| H | -1.00644 | 5.374115 | 9.15858  |
| H | -0.31166 | 3.967651 | 8.318251 |
| C | -2.63738 | 3.156584 | 9.623143 |
| H | -2.53244 | 2.696801 | 8.632579 |
| H | -3.23304 | 4.070832 | 9.511497 |

H -3.18339 2.467223 10.27316

**Table S9.** Geometry optimized coordinates of **3b'** at the B3LYP/LANL2DZ, 6-31G(d)  
level of theory.

E = - 4082.4341217 Hartree/particle

|    |          |          |          |
|----|----------|----------|----------|
| Ti | 10.31225 | -0.00014 | 7.60748  |
| Cl | 10.14129 | -0.27972 | 2.910712 |
| Cl | 13.06727 | -4.84094 | 2.534428 |
| O  | 10.62464 | -0.58888 | 5.806061 |
| O  | 17.00072 | -2.76974 | 11.02789 |
| O  | 16.62148 | -5.05433 | 11.15417 |
| O  | 9.203099 | 1.33196  | 7.143691 |
| N  | 12.25747 | -1.4581  | 7.942383 |
| C  | 11.16314 | -1.56162 | 5.098125 |
| C  | 11.043   | -1.56733 | 3.687066 |
| C  | 11.60921 | -2.56241 | 2.896553 |
| H  | 11.49261 | -2.53669 | 1.819578 |
| C  | 12.33043 | -3.58008 | 3.516321 |
| C  | 12.48215 | -3.60411 | 4.900191 |
| H  | 13.05348 | -4.40237 | 5.364337 |
| C  | 11.89874 | -2.61395 | 5.695522 |
| C  | 12.01189 | -2.72854 | 7.199771 |
| H  | 11.07857 | -3.13117 | 7.610226 |
| H  | 12.80692 | -3.44996 | 7.427    |
| C  | 13.44715 | -0.74004 | 7.419123 |
| H  | 13.44428 | -0.85015 | 6.332674 |
| H  | 14.37694 | -1.2037  | 7.776631 |
| C  | 12.36174 | -1.7688  | 9.414551 |
| H  | 11.3907  | -2.18267 | 9.697617 |
| H  | 12.44859 | -0.81787 | 9.936745 |
| C  | 13.47807 | -2.69944 | 9.855314 |
| C  | 13.26301 | -4.08025 | 9.955397 |
| H  | 12.28312 | -4.4806  | 9.710405 |
| C  | 14.26392 | -4.97051 | 10.38544 |
| H  | 14.08421 | -6.03719 | 10.46346 |
| C  | 15.48568 | -4.42018 | 10.71759 |
| C  | 15.71308 | -3.04778 | 10.63998 |
| C  | 14.73721 | -2.16622 | 10.22231 |
| H  | 14.92889 | -1.09809 | 10.20285 |
| C  | 17.5527  | -4.01367 | 11.47564 |
| H  | 18.49875 | -4.19948 | 10.95796 |
| H  | 17.70105 | -3.97852 | 12.56321 |

|    |          |          |          |
|----|----------|----------|----------|
| C  | 7.93     | 1.954365 | 7.192277 |
| H  | 7.17696  | 1.171585 | 7.015886 |
| C  | 7.836623 | 2.981804 | 6.063165 |
| H  | 6.835404 | 3.427178 | 6.029516 |
| H  | 8.04084  | 2.507454 | 5.098231 |
| H  | 8.565227 | 3.787247 | 6.215905 |
| C  | 7.694163 | 2.566182 | 8.574993 |
| H  | 7.786683 | 1.804737 | 9.355441 |
| H  | 6.692046 | 3.007793 | 8.632226 |
| H  | 8.429783 | 3.353141 | 8.778003 |
| O  | 10.62492 | 0.588578 | 9.408847 |
| O  | 9.203252 | -1.33226 | 8.071414 |
| N  | 12.25707 | 1.458263 | 7.272238 |
| C  | 13.44701 | 0.740492 | 7.795308 |
| Cl | 10.14213 | 0.279338 | 12.30427 |
| Cl | 13.0667  | 4.841493 | 12.68    |
| O  | 16.99941 | 2.771042 | 4.185732 |
| O  | 16.61961 | 5.055547 | 4.059597 |
| C  | 11.16323 | 1.561519 | 10.11667 |
| C  | 11.0433  | 1.56722  | 11.52775 |
| C  | 11.60931 | 2.562493 | 12.31815 |
| H  | 11.49289 | 2.536757 | 13.39514 |
| C  | 12.33012 | 3.580376 | 11.69825 |
| C  | 12.48163 | 3.604423 | 10.31436 |
| H  | 13.05263 | 4.402851 | 9.850101 |
| C  | 11.89841 | 2.614055 | 9.519137 |
| C  | 12.0113  | 2.728655 | 8.014869 |
| H  | 11.07781 | 3.131042 | 7.60456  |
| H  | 12.80612 | 3.450259 | 7.787508 |
| H  | 13.44429 | 0.850615 | 8.881758 |
| H  | 14.37663 | 1.204376 | 7.437642 |
| C  | 12.36101 | 1.768968 | 5.800047 |
| H  | 11.38982 | 2.1826   | 5.517153 |
| H  | 12.448   | 0.818054 | 5.27785  |
| C  | 13.47703 | 2.699873 | 5.359072 |
| C  | 13.26162 | 4.080642 | 5.259064 |
| H  | 12.28169 | 4.48075  | 5.504277 |
| C  | 14.26223 | 4.971147 | 4.828823 |
| H  | 14.08224 | 6.037779 | 4.750871 |
| C  | 15.48405 | 4.421115 | 4.496402 |
| C  | 15.71179 | 3.048767 | 4.573927 |
| C  | 14.73621 | 2.166967 | 4.991785 |
| H  | 14.92815 | 1.09888  | 5.011171 |
| C  | 17.55096 | 4.015105 | 3.737819 |
| H  | 18.49714 | 4.20113  | 4.255205 |
| H  | 17.69898 | 3.979999 | 2.650205 |

|   |          |          |          |
|---|----------|----------|----------|
| C | 7.930691 | -1.95575 | 8.022824 |
| H | 7.177024 | -1.1736  | 8.19931  |
| C | 7.838189 | -2.98334 | 9.151871 |
| H | 6.837293 | -3.42944 | 9.185597 |
| H | 8.042169 | -2.50891 | 10.11682 |
| H | 8.567346 | -3.78826 | 8.999002 |
| C | 7.695278 | -2.56766 | 6.640075 |
| H | 7.787113 | -1.80608 | 5.859674 |
| H | 6.693521 | -3.01009 | 6.58288  |
| H | 8.431528 | -3.354   | 6.436947 |

**Table S10.** Geometry optimized coordinates of **4b'** at the B3LYP/LANL2DZ, 6-31G(d)

level of theory.

E = -3705.384965 Hartree/particle

|    |          |          |          |
|----|----------|----------|----------|
| Ti | 8.285817 | 4.953504 | 15.96595 |
| Cl | 3.871488 | 6.496422 | 16.43537 |
| Cl | 2.678578 | 3.5248   | 20.81915 |
| Cl | 12.2772  | 0.89504  | 11.0544  |
| Cl | 12.86374 | 3.70392  | 15.65912 |
| O  | 9.14333  | 5.886491 | 17.24953 |
| O  | 8.08294  | 6.10969  | 14.59293 |
| O  | 6.528394 | 5.197454 | 16.68088 |
| O  | 9.942386 | 4.160326 | 15.37899 |
| N  | 8.062886 | 2.925711 | 17.39203 |
| N  | 7.403076 | 3.241166 | 14.50809 |
| C  | 10.45092 | 6.267494 | 17.66119 |
| H  | 11.1545  | 5.536476 | 17.24054 |
| C  | 10.52282 | 6.235837 | 19.1895  |
| H  | 9.799469 | 6.936742 | 19.62157 |
| H  | 11.52603 | 6.514114 | 19.53279 |
| H  | 10.30058 | 5.233913 | 19.57335 |
| C  | 10.78163 | 7.653022 | 17.10294 |
| H  | 10.74872 | 7.644949 | 16.00946 |
| H  | 11.78784 | 7.95955  | 17.41276 |
| H  | 10.06327 | 8.395181 | 17.47015 |
| C  | 8.090577 | 7.496212 | 14.27663 |
| H  | 8.340834 | 8.049368 | 15.19319 |
| C  | 9.166302 | 7.762104 | 13.22143 |
| H  | 10.14863 | 7.433705 | 13.57638 |
| H  | 9.22056  | 8.831933 | 12.98724 |
| H  | 8.937649 | 7.21832  | 12.29706 |
| C  | 6.695543 | 7.916615 | 13.81168 |



|   |          |          |          |
|---|----------|----------|----------|
| H | 6.424149 | 7.388368 | 12.88933 |
| H | 6.667149 | 8.994199 | 13.60997 |
| H | 5.952068 | 7.683418 | 14.57896 |
| C | 5.682953 | 4.824303 | 17.62188 |
| C | 4.364807 | 5.338362 | 17.65461 |
| C | 3.444389 | 4.957471 | 18.62692 |
| H | 2.444634 | 5.375384 | 18.6251  |
| C | 3.831157 | 4.028431 | 19.58933 |
| C | 5.115127 | 3.488873 | 19.583   |
| H | 5.396941 | 2.761243 | 20.33794 |
| C | 6.043304 | 3.884919 | 18.61722 |
| C | 7.45442  | 3.348463 | 18.68873 |
| H | 8.119412 | 4.122391 | 19.0889  |
| H | 7.462082 | 2.509041 | 19.39534 |
| C | 9.434274 | 2.363987 | 17.65624 |
| H | 10.01404 | 3.178712 | 18.09721 |
| H | 9.890047 | 2.155169 | 16.68989 |
| C | 9.522688 | 1.129128 | 18.53761 |
| C | 9.697983 | 1.239243 | 19.9257  |
| H | 9.772387 | 2.225341 | 20.37857 |
| C | 9.798084 | 0.104355 | 20.73184 |
| H | 9.936565 | 0.214377 | 21.80404 |
| C | 9.731799 | -1.16794 | 20.16048 |
| H | 9.812562 | -2.05276 | 20.78586 |
| C | 9.578934 | -1.29613 | 18.7789  |
| H | 9.547255 | -2.28176 | 18.32238 |
| C | 9.481575 | -0.15726 | 17.97755 |
| H | 9.395232 | -0.27057 | 16.89909 |
| C | 7.192129 | 1.97712  | 16.65523 |
| H | 6.159916 | 2.307952 | 16.78798 |
| H | 7.252487 | 0.966553 | 17.08265 |
| C | 7.537616 | 1.918251 | 15.16935 |
| H | 8.570346 | 1.589408 | 15.03635 |
| H | 6.904871 | 1.167346 | 14.67704 |
| C | 5.965975 | 3.603773 | 14.22293 |
| H | 5.445948 | 3.628678 | 15.17965 |
| H | 5.989338 | 4.632854 | 13.85754 |
| C | 5.207374 | 2.715193 | 13.25267 |
| C | 4.472914 | 1.611231 | 13.7128  |
| H | 4.441167 | 1.395159 | 14.77849 |
| C | 3.758427 | 0.801455 | 12.82824 |
| H | 3.194347 | -0.04635 | 13.20763 |
| C | 3.757074 | 1.089712 | 11.46244 |
| H | 3.197823 | 0.463801 | 10.77248 |
| C | 4.464037 | 2.197442 | 10.99028 |
| H | 4.452963 | 2.440782 | 9.931239 |

|   |          |          |          |
|---|----------|----------|----------|
| C | 5.177793 | 3.002416 | 11.87917 |
| H | 5.708158 | 3.87508  | 11.50525 |
| C | 8.179689 | 3.297661 | 13.2333  |
| H | 8.072515 | 4.325967 | 12.87219 |
| H | 7.720376 | 2.632706 | 12.49151 |
| C | 9.647092 | 2.943815 | 13.33512 |
| C | 10.21666 | 2.159973 | 12.32848 |
| H | 9.592745 | 1.773121 | 11.52846 |
| C | 11.57991 | 1.876887 | 12.33685 |
| C | 12.39732 | 2.354179 | 13.35745 |
| H | 13.45768 | 2.13193  | 13.37385 |
| C | 11.82646 | 3.119739 | 14.36995 |
| C | 10.44813 | 3.444333 | 14.39158 |

**Table S11.** Geometry optimized coordinates of **4c'** at the B3LYP/LANL2DZ, 6-31G(d)

level of theory.

E = -3468.1832782 Hartree/particle

|    |          |          |          |
|----|----------|----------|----------|
| Ti | 1.002368 | -0.21611 | -0.84636 |
| Cl | -0.34502 | -4.55122 | -1.15495 |
| Cl | -5.70865 | -3.70568 | -1.31019 |
| Cl | 4.161501 | 5.079715 | 3.222707 |
| Cl | 2.287502 | 4.227271 | -1.80276 |
| O  | 2.54609  | -1.10615 | -0.40489 |
| O  | -0.21994 | -1.57946 | -1.30082 |
| O  | 1.502811 | 1.598734 | -0.72596 |
| N  | -1.32859 | 0.889796 | -0.5756  |
| N  | 0.763436 | -0.10061 | 1.392402 |
| C  | -1.45339 | -2.06073 | -1.31096 |
| C  | -1.69807 | -3.45014 | -1.24593 |
| C  | -2.99447 | -3.95997 | -1.25054 |
| H  | -3.15806 | -5.03012 | -1.20234 |
| C  | -4.06837 | -3.07412 | -1.31299 |
| C  | -3.85984 | -1.69757 | -1.36965 |
| H  | -4.70933 | -1.02303 | -1.41425 |
| C  | -2.55967 | -1.18814 | -1.37543 |
| C  | -2.32348 | 0.294878 | -1.51674 |
| H  | -1.94492 | 0.511346 | -2.52601 |
| H  | -3.28934 | 0.806889 | -1.42101 |
| C  | -1.26756 | 2.3741   | -0.81281 |
| H  | -0.9228  | 2.504452 | -1.84272 |
| H  | -0.47732 | 2.773519 | -0.18008 |
| C  | -2.54477 | 3.167117 | -0.58988 |

|   |          |          |          |
|---|----------|----------|----------|
| C | -3.43855 | 3.414387 | -1.64334 |
| H | -3.21252 | 3.034278 | -2.63706 |
| C | -4.60172 | 4.158648 | -1.44122 |
| H | -5.27709 | 4.340779 | -2.27275 |
| C | -4.88959 | 4.677815 | -0.17746 |
| H | -5.7927  | 5.260633 | -0.01902 |
| C | -4.00111 | 4.459255 | 0.876835 |
| H | -4.20593 | 4.877506 | 1.85862  |
| C | -2.83802 | 3.716171 | 0.66815  |
| H | -2.13697 | 3.582397 | 1.489174 |
| C | -1.61943 | 0.545127 | 0.835252 |
| H | -1.93153 | -0.50156 | 0.861933 |
| H | -2.46305 | 1.130665 | 1.228802 |
| C | -0.41055 | 0.757396 | 1.742948 |
| H | -0.07616 | 1.794822 | 1.688161 |
| H | -0.70068 | 0.574949 | 2.784846 |
| C | 0.604108 | -1.52682 | 1.888548 |
| H | -0.2738  | -1.93614 | 1.384183 |
| H | 1.468631 | -2.07129 | 1.502717 |
| C | 0.47631  | -1.72342 | 3.386655 |
| C | -0.78473 | -1.76407 | 4.001296 |
| H | -1.68183 | -1.65873 | 3.394878 |
| C | -0.90724 | -1.96544 | 5.377093 |
| H | -1.89314 | -1.99751 | 5.832653 |
| C | 0.234142 | -2.13955 | 6.161684 |
| H | 0.141088 | -2.30107 | 7.23202  |
| C | 1.495101 | -2.12274 | 5.561826 |
| H | 2.38709  | -2.27725 | 6.162598 |
| C | 1.612974 | -1.9209  | 4.186099 |
| H | 2.597378 | -1.93335 | 3.724491 |
| C | 2.021562 | 0.495976 | 1.952694 |
| H | 2.831064 | -0.1795  | 1.660448 |
| H | 1.957775 | 0.49171  | 3.046913 |
| C | 2.354107 | 1.906453 | 1.498932 |
| C | 2.968199 | 2.759042 | 2.421848 |
| H | 3.130635 | 2.423621 | 3.44151  |
| C | 3.385722 | 4.031987 | 2.043746 |
| C | 3.186792 | 4.49074  | 0.74412  |
| H | 3.505424 | 5.482611 | 0.446474 |
| C | 2.559252 | 3.652217 | -0.17203 |
| C | 2.13427  | 2.349307 | 0.170991 |
| O | 2.423645 | -0.84433 | -1.81929 |

**Table S12.** Geometry optimized transition state coordinates of **4d'** at the B3LYP/LANL2DZ, 6-31G(d) level of theory.

E = -4137.9077853 Hartree/particle

Calculated frequency along the bond O4•••O1•••S1 is i462.

|    |          |          |          |
|----|----------|----------|----------|
| Ti | -0.16786 | -0.09229 | -1.45375 |
| Cl | -3.32838 | -3.44167 | -0.44586 |
| Cl | -7.38659 | 0.125016 | 0.084783 |
| Cl | 6.296609 | 2.252966 | 1.817145 |
| Cl | 3.473138 | 2.129691 | -2.82329 |
| O  | -0.09127 | -0.91244 | -3.13442 |
| O  | -1.65606 | -1.02263 | -0.72923 |
| O  | 1.688702 | 0.313077 | -1.30226 |
| N  | -1.12635 | 1.697909 | -0.29997 |
| N  | 0.522633 | -0.36531 | 1.220279 |
| C  | -2.94513 | -0.73826 | -0.59235 |
| C  | -3.88591 | -1.77794 | -0.41616 |
| C  | -5.24113 | -1.53316 | -0.21868 |
| H  | -5.93289 | -2.35738 | -0.09219 |
| C  | -5.68039 | -0.21293 | -0.1789  |
| C  | -4.78352 | 0.840101 | -0.33432 |
| H  | -5.14723 | 1.862345 | -0.29445 |
| C  | -3.42396 | 0.596129 | -0.55086 |
| C  | -2.52826 | 1.795786 | -0.81231 |
| H  | -2.44258 | 1.951    | -1.89253 |
| H  | -3.00933 | 2.682514 | -0.38102 |
| C  | -0.34035 | 2.919538 | -0.71858 |
| H  | -0.33776 | 2.906989 | -1.81123 |
| H  | 0.691326 | 2.754046 | -0.39964 |
| C  | -0.82593 | 4.263381 | -0.20717 |
| C  | -1.75249 | 5.01975  | -0.9415  |
| H  | -2.12254 | 4.63799  | -1.89007 |
| C  | -2.19057 | 6.262165 | -0.48106 |
| H  | -2.90595 | 6.83295  | -1.06687 |
| C  | -1.70145 | 6.775271 | 0.722022 |
| H  | -2.03854 | 7.74431  | 1.079707 |
| C  | -0.76423 | 6.0445   | 1.45423  |
| H  | -0.36376 | 6.444635 | 2.381795 |
| C  | -0.32885 | 4.802375 | 0.989386 |
| H  | 0.422243 | 4.254605 | 1.554295 |
| C  | -1.13622 | 1.501296 | 1.177099 |
| H  | -1.94644 | 0.805168 | 1.401587 |
| H  | -1.38791 | 2.446679 | 1.67619  |

|   |          |          |          |
|---|----------|----------|----------|
| C | 0.179554 | 0.971185 | 1.742    |
| H | 0.997732 | 1.647322 | 1.481323 |
| H | 0.113958 | 0.978232 | 2.841372 |
| C | -0.28642 | -1.46447 | 1.834291 |
| H | -1.3339  | -1.25804 | 1.618933 |
| H | -0.03718 | -2.37386 | 1.27952  |
| C | -0.10801 | -1.70383 | 3.325685 |
| C | -0.9298  | -1.05656 | 4.261242 |
| H | -1.71557 | -0.38957 | 3.912931 |
| C | -0.77441 | -1.2748  | 5.631467 |
| H | -1.42475 | -0.76451 | 6.336979 |
| C | 0.204686 | -2.15663 | 6.092257 |
| H | 0.325129 | -2.33152 | 7.157908 |
| C | 1.017381 | -2.8249  | 5.174198 |
| H | 1.770139 | -3.52696 | 5.523266 |
| C | 0.858163 | -2.60171 | 3.805667 |
| H | 1.480611 | -3.14308 | 3.096756 |
| C | 1.967661 | -0.67038 | 1.36538  |
| H | 2.122254 | -1.64823 | 0.890338 |
| H | 2.237874 | -0.78344 | 2.425388 |
| C | 2.910119 | 0.334312 | 0.746104 |
| C | 4.003175 | 0.807194 | 1.475916 |
| H | 4.13992  | 0.496657 | 2.507229 |
| C | 4.923233 | 1.670383 | 0.88449  |
| C | 4.769372 | 2.082733 | -0.43687 |
| H | 5.482638 | 2.755615 | -0.89805 |
| C | 3.673969 | 1.618218 | -1.16085 |
| C | 2.720829 | 0.740015 | -0.595   |
| O | -0.74114 | 0.744502 | -2.85523 |
| S | 0.899132 | -2.86525 | -3.46437 |
| C | 1.544311 | -3.5848  | -1.96734 |
| C | 2.880509 | -3.48788 | -1.55268 |
| C | 0.623616 | -4.30707 | -1.18713 |
| C | 3.290856 | -4.12793 | -0.38069 |
| C | 1.044468 | -4.93802 | -0.01833 |
| C | 2.380673 | -4.85655 | 0.387617 |
| H | 3.603919 | -2.92827 | -2.13453 |
| H | -0.41677 | -4.36684 | -1.49459 |
| H | 4.330912 | -4.05724 | -0.07377 |
| H | 0.325925 | -5.4982  | 0.573431 |
| H | 2.709344 | -5.3615  | 1.291635 |
| C | 2.317843 | -1.98764 | -4.18261 |
| H | 3.115909 | -2.6829  | -4.45554 |
| H | 1.923817 | -1.50616 | -5.07948 |
| H | 2.668779 | -1.21264 | -3.49824 |

**Table S13.** Geometry optimized coordinates of **4e'** at the B3LYP/LANL2DZ, 6-31G(d)

level of theory.

E = -4137.9990636 Hartree/particle

|    |          |          |          |
|----|----------|----------|----------|
| Ti | 0.61616  | 0.009415 | -1.19265 |
| Cl | -0.56441 | -4.60482 | -0.88359 |
| Cl | -5.82402 | -3.63111 | -1.83711 |
| Cl | 3.67656  | 5.287395 | 3.35207  |
| Cl | 2.341278 | 4.248003 | -1.81084 |
| O  | 2.355141 | -1.12648 | -1.27366 |
| O  | -0.34654 | -1.65529 | -0.88544 |
| O  | 1.637595 | 1.580115 | -0.75328 |
| N  | -1.40248 | 0.924044 | -0.56604 |
| N  | 0.638022 | 0.003807 | 1.464051 |
| C  | -1.5682  | -2.07332 | -1.14744 |
| C  | -1.86816 | -3.45769 | -1.15841 |
| C  | -3.15125 | -3.94772 | -1.37536 |
| H  | -3.33694 | -5.0153  | -1.37787 |
| C  | -4.18611 | -3.03787 | -1.57611 |
| C  | -3.94029 | -1.66804 | -1.56191 |
| H  | -4.76236 | -0.97507 | -1.71515 |
| C  | -2.64664 | -1.1769  | -1.36286 |
| C  | -2.43715 | 0.321805 | -1.46653 |
| H  | -2.11837 | 0.573026 | -2.48335 |
| H  | -3.40103 | 0.812109 | -1.28275 |
| C  | -1.31223 | 2.407182 | -0.84992 |
| H  | -0.97095 | 2.489482 | -1.88461 |
| H  | -0.51187 | 2.803727 | -0.22571 |
| C  | -2.57187 | 3.22937  | -0.64193 |
| C  | -3.46924 | 3.455016 | -1.69709 |
| H  | -3.25994 | 3.029691 | -2.67573 |
| C  | -4.61475 | 4.230561 | -1.5135  |
| H  | -5.29426 | 4.394593 | -2.34555 |
| C  | -4.88029 | 4.803344 | -0.26799 |
| H  | -5.76978 | 5.410707 | -0.12435 |
| C  | -3.98788 | 4.604975 | 0.786961 |
| H  | -4.17601 | 5.062588 | 1.75452  |
| C  | -2.84285 | 3.829435 | 0.59738  |
| H  | -2.1397  | 3.706513 | 1.418155 |
| C  | -1.7055  | 0.629267 | 0.863099 |
| H  | -2.02439 | -0.41366 | 0.912577 |
| H  | -2.55597 | 1.236265 | 1.201675 |
| C  | -0.51688 | 0.859049 | 1.799481 |
| H  | -0.18709 | 1.898882 | 1.736997 |

|   |          |          |          |
|---|----------|----------|----------|
| H | -0.85593 | 0.706547 | 2.835526 |
| C | 0.491745 | -1.4074  | 1.938492 |
| H | -0.38508 | -1.82657 | 1.446387 |
| H | 1.350187 | -1.95287 | 1.533859 |
| C | 0.397946 | -1.62574 | 3.44026  |
| C | -0.84963 | -1.65578 | 4.082848 |
| H | -1.757   | -1.5393  | 3.494083 |
| C | -0.94772 | -1.85952 | 5.460432 |
| H | -1.92518 | -1.88172 | 5.935091 |
| C | 0.206108 | -2.04844 | 6.223185 |
| H | 0.132389 | -2.21145 | 7.295014 |
| C | 1.454369 | -2.04284 | 5.597493 |
| H | 2.356968 | -2.20733 | 6.180229 |
| C | 1.54575  | -1.83701 | 4.219919 |
| H | 2.521206 | -1.85681 | 3.739116 |
| C | 1.931956 | 0.558905 | 1.935276 |
| H | 2.704977 | -0.1041  | 1.522414 |
| H | 2.00765  | 0.497271 | 3.030512 |
| C | 2.231907 | 1.984414 | 1.529145 |
| C | 2.707603 | 2.881269 | 2.489287 |
| H | 2.797713 | 2.566354 | 3.524492 |
| C | 3.0749   | 4.174837 | 2.12678  |
| C | 2.968034 | 4.603138 | 0.805941 |
| H | 3.250318 | 5.609807 | 0.52097  |
| C | 2.483266 | 3.71339  | -0.14843 |
| C | 2.102415 | 2.387262 | 0.175821 |
| O | 0.323103 | 0.22154  | -2.79861 |
| S | 2.474268 | -2.20072 | -2.4042  |
| C | 4.028509 | -3.03263 | -2.03208 |
| C | 5.064615 | -2.34354 | -1.39683 |
| C | 4.147633 | -4.37965 | -2.37889 |
| C | 6.252224 | -3.02086 | -1.12355 |
| C | 5.346386 | -5.04354 | -2.10796 |
| C | 6.394423 | -4.36521 | -1.483   |
| H | 4.927103 | -1.30574 | -1.10938 |
| H | 3.317152 | -4.90494 | -2.84311 |
| H | 7.066858 | -2.50048 | -0.628   |
| H | 5.453916 | -6.0911  | -2.37341 |
| H | 7.322293 | -4.88684 | -1.26614 |
| C | 2.974098 | -1.2275  | -3.86276 |
| H | 3.14694  | -1.91653 | -4.6944  |
| H | 2.132476 | -0.5588  | -4.06554 |
| H | 3.875852 | -0.65915 | -3.62385 |

**Table S14.** Geometry optimized transition state coordinates of **4f<sup>‡</sup>** at the B3LYP/LANL2DZ, 6-31G(d) level of theory.

E = -4289.5007516 Hartree/particle

Calculated frequency along the bond O4•••H36•••O5 is i1462.

|    |          |          |          |
|----|----------|----------|----------|
| Ti | -0.07156 | -0.03671 | -1.07775 |
| Cl | 3.585688 | -2.5642  | -2.91159 |
| Cl | 3.871668 | -5.92747 | 1.343165 |
| Cl | -0.95786 | 7.171985 | 0.899954 |
| Cl | -3.70486 | 2.530163 | 0.254449 |
| O  | -2.84165 | -2.63146 | 0.38757  |
| O  | 1.372137 | -1.31962 | -1.36025 |
| O  | -1.07213 | 1.493123 | -0.64332 |
| N  | 0.179096 | -0.65333 | 1.074701 |
| N  | 1.716198 | 1.497134 | -0.3982  |
| C  | 1.914768 | -2.36651 | -0.75577 |
| C  | 2.990377 | -3.07197 | -1.34094 |
| C  | 3.58973  | -4.16234 | -0.71766 |
| H  | 4.409485 | -4.68304 | -1.19823 |
| C  | 3.119953 | -4.56043 | 0.531137 |
| C  | 2.070147 | -3.88294 | 1.145902 |
| H  | 1.720088 | -4.20491 | 2.121808 |
| C  | 1.457881 | -2.79915 | 0.510788 |
| C  | 0.258925 | -2.15406 | 1.166881 |
| H  | -0.67669 | -2.52932 | 0.732904 |
| H  | 0.255307 | -2.43665 | 2.225304 |
| C  | -1.06605 | -0.18562 | 1.816773 |
| H  | -1.91308 | -0.57036 | 1.244153 |
| H  | -1.08217 | 0.901089 | 1.744593 |
| C  | -1.20053 | -0.6099  | 3.266541 |
| C  | -1.91833 | -1.77051 | 3.599369 |
| H  | -2.36865 | -2.35992 | 2.804304 |
| C  | -2.07221 | -2.15187 | 4.933034 |
| H  | -2.63248 | -3.05135 | 5.174374 |
| C  | -1.51971 | -1.37696 | 5.955462 |
| H  | -1.643   | -1.67375 | 6.993547 |
| C  | -0.82393 | -0.20887 | 5.638991 |
| H  | -0.40997 | 0.411673 | 6.429247 |
| C  | -0.67191 | 0.172546 | 4.304553 |
| H  | -0.15859 | 1.102917 | 4.070796 |
| C  | 1.431724 | -0.01417 | 1.584701 |
| H  | 2.265056 | -0.64378 | 1.267357 |
| H  | 1.431889 | -0.02096 | 2.68171  |



|   |          |          |          |
|---|----------|----------|----------|
| C | 1.63365  | 1.417715 | 1.084497 |
| H | 0.801434 | 2.046975 | 1.405811 |
| H | 2.535289 | 1.832907 | 1.555472 |
| C | 3.056886 | 1.058733 | -0.93241 |
| H | 3.209185 | 0.03111  | -0.60383 |
| H | 2.943854 | 1.025168 | -2.01901 |
| C | 4.262007 | 1.897416 | -0.54559 |
| C | 5.001627 | 1.608802 | 0.612137 |
| H | 4.714918 | 0.765247 | 1.236694 |
| C | 6.120126 | 2.367648 | 0.961416 |
| H | 6.678981 | 2.123745 | 1.860976 |
| C | 6.527439 | 3.426778 | 0.14849  |
| H | 7.400299 | 4.016178 | 0.415645 |
| C | 5.817797 | 3.71233  | -1.01968 |
| H | 6.140229 | 4.52125  | -1.66973 |
| C | 4.699663 | 2.951087 | -1.3634  |
| H | 4.168085 | 3.165137 | -2.28762 |
| C | 1.410155 | 2.865919 | -0.91944 |
| H | 1.323624 | 2.751318 | -2.00687 |
| H | 2.251733 | 3.539375 | -0.7188  |
| C | 0.156908 | 3.511755 | -0.37557 |
| C | 0.173822 | 4.856749 | -0.00204 |
| H | 1.098105 | 5.423545 | -0.05531 |
| C | -0.99518 | 5.477199 | 0.435179 |
| C | -2.19351 | 4.772354 | 0.518802 |
| H | -3.10123 | 5.25453  | 0.861692 |
| C | -2.20822 | 3.427864 | 0.155286 |
| C | -1.04389 | 2.772291 | -0.29999 |
| O | -1.25522 | -0.84653 | -2.0443  |
| S | -3.30708 | -2.97904 | -1.02636 |
| C | -4.59438 | -1.78132 | -1.48069 |
| C | -5.26326 | -1.08311 | -0.47622 |
| C | -4.87155 | -1.56137 | -2.83    |
| C | -6.25263 | -0.16588 | -0.83279 |
| C | -5.86619 | -0.64472 | -3.17664 |
| C | -6.55631 | 0.049567 | -2.18014 |
| H | -4.99024 | -1.25097 | 0.561474 |
| H | -4.31047 | -2.08452 | -3.60008 |
| H | -6.78327 | 0.384502 | -0.06051 |
| H | -6.09052 | -0.46264 | -4.22391 |
| H | -7.32308 | 0.768897 | -2.45406 |
| C | -4.43148 | -4.41522 | -0.80482 |
| H | -4.91862 | -4.64712 | -1.75633 |
| H | -3.81587 | -5.25932 | -0.48236 |
| H | -5.1736  | -4.17482 | -0.03907 |
| O | 0.261266 | 0.529561 | -3.08483 |

|   |          |          |          |
|---|----------|----------|----------|
| O | 1.509716 | 0.11515  | -3.69884 |
| H | 1.744526 | -0.66813 | -3.15164 |
| H | -0.64771 | -0.35746 | -2.97055 |

**Table S15.** Geometry optimized coordinates of **4g'** at the B3LYP/LANL2DZ, 6-31G(d)

level of theory.

E = -4289.5495653 Hartree/particle

|    |          |          |          |
|----|----------|----------|----------|
| Ti | 1.866291 | -0.90233 | -1.27576 |
| Cl | 0.219359 | -5.2909  | -0.65362 |
| Cl | -4.75235 | -4.19534 | -2.56515 |
| Cl | 4.597852 | 4.651734 | 3.022037 |
| Cl | 4.01316  | 3.141455 | -2.16261 |
| O  | -0.18735 | 0.542963 | -5.56124 |
| O  | 0.694939 | -2.43567 | -1.17337 |
| O  | 2.743638 | 0.749962 | -0.98285 |
| N  | -0.19753 | 0.229785 | -1.43599 |
| N  | 1.205029 | -0.43532 | 1.071676 |
| C  | -0.52585 | -2.81051 | -1.51861 |
| C  | -0.93835 | -4.14655 | -1.31589 |
| C  | -2.21818 | -4.58754 | -1.63629 |
| H  | -2.50091 | -5.62038 | -1.4712  |
| C  | -3.12179 | -3.66908 | -2.16478 |
| C  | -2.75279 | -2.34235 | -2.37573 |
| H  | -3.47246 | -1.6446  | -2.79265 |
| C  | -1.46063 | -1.90518 | -2.07105 |
| C  | -1.07118 | -0.48541 | -2.42315 |
| H  | -0.5371  | -0.46435 | -3.37751 |
| H  | -1.99265 | 0.093461 | -2.55736 |
| C  | 0.105024 | 1.611443 | -1.9881  |
| H  | 0.637134 | 1.437281 | -2.92424 |
| H  | 0.809521 | 2.078757 | -1.30241 |
| C  | -1.07721 | 2.538602 | -2.20947 |
| C  | -1.74797 | 2.575408 | -3.44348 |
| H  | -1.41774 | 1.925777 | -4.24995 |
| C  | -2.81503 | 3.453438 | -3.6452  |
| H  | -3.32155 | 3.46963  | -4.60684 |
| C  | -3.22565 | 4.313957 | -2.62487 |
| H  | -4.05502 | 4.997638 | -2.78596 |
| C  | -2.55366 | 4.30267  | -1.40129 |
| H  | -2.8517  | 4.982257 | -0.60718 |
| C  | -1.48625 | 3.425533 | -1.20105 |
| H  | -0.94974 | 3.44647  | -0.25439 |

|   |          |          |          |
|---|----------|----------|----------|
| C | -0.8574  | 0.284078 | -0.1039  |
| H | -1.33303 | -0.68506 | 0.062177 |
| H | -1.65888 | 1.033727 | -0.10319 |
| C | 0.130801 | 0.583673 | 1.016289 |
| H | 0.603487 | 1.554788 | 0.85338  |
| H | -0.40624 | 0.653309 | 1.972528 |
| C | 0.749313 | -1.72621 | 1.701136 |
| H | -0.06804 | -2.11016 | 1.092503 |
| H | 1.580747 | -2.42345 | 1.577918 |
| C | 0.316451 | -1.67187 | 3.156124 |
| C | -1.02451 | -1.43776 | 3.498305 |
| H | -1.76243 | -1.30041 | 2.710864 |
| C | -1.43349 | -1.4065  | 4.832673 |
| H | -2.47778 | -1.22639 | 5.073433 |
| C | -0.5053  | -1.62067 | 5.853075 |
| H | -0.82164 | -1.60166 | 6.892412 |
| C | 0.8287   | -1.87694 | 5.529662 |
| H | 1.554344 | -2.06428 | 6.316623 |
| C | 1.232017 | -1.90577 | 4.193911 |
| H | 2.268449 | -2.12901 | 3.951613 |
| C | 2.406858 | 0.061101 | 1.804963 |
| H | 3.157017 | -0.73471 | 1.723373 |
| H | 2.168848 | 0.177445 | 2.869809 |
| C | 2.995253 | 1.364023 | 1.313245 |
| C | 3.429564 | 2.307106 | 2.248337 |
| H | 3.287489 | 2.122676 | 3.308763 |
| C | 4.0525   | 3.479819 | 1.828955 |
| C | 4.241521 | 3.743812 | 0.474451 |
| H | 4.721204 | 4.658122 | 0.145908 |
| C | 3.793999 | 2.81281  | -0.4583  |
| C | 3.168841 | 1.604687 | -0.0693  |
| O | 1.918509 | -0.75362 | -3.11245 |
| S | 1.072472 | -0.00183 | -6.21321 |
| C | 2.293319 | 1.348236 | -6.2657  |
| C | 1.893758 | 2.632358 | -5.90246 |
| C | 3.617019 | 1.069357 | -6.61232 |
| C | 2.836395 | 3.663008 | -5.90756 |
| C | 4.55063  | 2.106432 | -6.61976 |
| C | 4.160621 | 3.40182  | -6.26767 |
| H | 0.862455 | 2.80615  | -5.61059 |
| H | 3.922152 | 0.056528 | -6.86661 |
| H | 2.537431 | 4.668332 | -5.62408 |
| H | 5.583238 | 1.901357 | -6.88803 |
| H | 4.892249 | 4.204905 | -6.26495 |
| C | 0.720616 | -0.03196 | -8.0167  |
| H | 1.633239 | -0.2813  | -8.56548 |

|   |          |          |          |
|---|----------|----------|----------|
| H | -0.04051 | -0.79901 | -8.18277 |
| H | 0.341308 | 0.947388 | -8.31965 |
| O | 3.175886 | -1.86085 | -0.29632 |
| O | 3.275258 | -2.65497 | -1.5079  |
| H | 2.609742 | -3.35865 | -1.33543 |
| H | 2.507632 | -1.36668 | -3.57916 |

**Table S16.** Geometry optimized transition state coordinates of **4h'** at the

B3LYP/LANL2DZ, 6-31G(d) level of theory.

E = -3544.5903857 Hartree/particle

Calculated frequency along the bond O4●●●H28●●●O5 is i1236.

|    |          |          |          |
|----|----------|----------|----------|
| Ti | 0.130259 | -0.05715 | -1.76455 |
| Cl | -3.74741 | -2.56961 | -2.17683 |
| Cl | -6.91834 | 0.677709 | 0.805643 |
| Cl | 6.963364 | -1.15505 | 0.941828 |
| Cl | 4.070023 | 2.526129 | -1.80822 |
| O  | 0.973427 | -1.45965 | -2.63159 |
| O  | -1.71543 | -0.44209 | -1.70781 |
| O  | 1.829274 | 0.670153 | -1.30626 |
| N  | -0.61945 | 1.452872 | 0.030352 |
| N  | 0.538488 | -1.29255 | 0.148257 |
| C  | -2.88816 | -0.19256 | -1.14344 |
| C  | -3.96635 | -1.09637 | -1.26443 |
| C  | -5.20172 | -0.83527 | -0.67551 |
| H  | -6.01608 | -1.54187 | -0.7835  |
| C  | -5.36743 | 0.341449 | 0.052117 |
| C  | -4.31981 | 1.249437 | 0.196866 |
| H  | -4.4675  | 2.158274 | 0.77199  |
| C  | -3.08498 | 0.991336 | -0.40118 |
| C  | -1.96776 | 2.002334 | -0.30751 |
| H  | -1.84485 | 2.514601 | -1.27104 |
| H  | -2.25542 | 2.765562 | 0.425336 |
| C  | 0.355712 | 2.601486 | 0.139534 |
| H  | 0.40229  | 3.048012 | -0.85734 |
| H  | 1.337032 | 2.168199 | 0.317885 |
| C  | 0.060833 | 3.660486 | 1.186333 |
| C  | -0.68967 | 4.804454 | 0.872286 |
| H  | -1.06786 | 4.934727 | -0.13911 |
| C  | -0.93826 | 5.788283 | 1.830328 |
| H  | -1.51853 | 6.66738  | 1.56332  |
| C  | -0.43109 | 5.64969  | 3.123914 |

|   |          |          |          |
|---|----------|----------|----------|
| H | -0.6202  | 6.41669  | 3.86985  |
| C | 0.336629 | 4.529743 | 3.44758  |
| H | 0.75476  | 4.424315 | 4.444993 |
| C | 0.583357 | 3.549673 | 2.484581 |
| H | 1.212591 | 2.699246 | 2.738081 |
| C | -0.65911 | 0.614743 | 1.257243 |
| H | -1.60784 | 0.07393  | 1.257642 |
| H | -0.65526 | 1.236024 | 2.162885 |
| C | 0.504476 | -0.37083 | 1.319983 |
| H | 1.454341 | 0.166316 | 1.335961 |
| H | 0.448413 | -0.94437 | 2.254251 |
| C | -0.5074  | -2.38516 | 0.234138 |
| H | -1.47742 | -1.8944  | 0.302929 |
| H | -0.48047 | -2.89528 | -0.73182 |
| C | -0.36847 | -3.38701 | 1.365864 |
| C | -0.98836 | -3.16187 | 2.604683 |
| H | -1.57902 | -2.26069 | 2.754697 |
| C | -0.88422 | -4.09154 | 3.640759 |
| H | -1.37477 | -3.89854 | 4.590928 |
| C | -0.16447 | -5.27226 | 3.450107 |
| H | -0.08613 | -5.99968 | 4.253298 |
| C | 0.439948 | -5.5213  | 2.216106 |
| H | 0.986209 | -6.44622 | 2.052831 |
| C | 0.334184 | -4.58816 | 1.18408  |
| H | 0.790968 | -4.79972 | 0.220231 |
| C | 1.888188 | -1.93327 | 0.018333 |
| H | 1.825818 | -2.58289 | -0.86185 |
| H | 2.059915 | -2.57673 | 0.888879 |
| C | 3.070788 | -0.99851 | -0.11977 |
| C | 4.293892 | -1.40391 | 0.423969 |
| H | 4.358737 | -2.33776 | 0.974094 |
| C | 5.433003 | -0.62294 | 0.257552 |
| C | 5.374761 | 0.585669 | -0.43349 |
| H | 6.25831  | 1.200256 | -0.5584  |
| C | 4.154588 | 0.999559 | -0.95697 |
| C | 2.979062 | 0.222986 | -0.8259  |
| O | 0.126074 | -0.88395 | -3.65297 |
| O | 0.126252 | 1.408471 | -3.21384 |
| H | -0.75197 | 1.664156 | -3.54439 |
| H | 0.355132 | 0.303653 | -3.79304 |

**Table S17.** Geometry optimized coordinates of **TiOOH<sup>⊕</sup>** at the B3LYP/LANL2DZ, 6-31G(d) level of theory.

E = -3468.5632795 Hartree/particle

|    |          |          |          |
|----|----------|----------|----------|
| Ti | 0.821714 | -0.1943  | -0.72934 |
| Cl | -0.30279 | -4.50096 | -1.80376 |
| Cl | -5.67459 | -3.6965  | -1.77127 |
| Cl | 3.927512 | 5.300016 | 2.992145 |
| Cl | 2.329901 | 4.028781 | -2.03222 |
| O  | 2.341633 | -1.23328 | -0.30501 |
| O  | -0.22054 | -1.55479 | -1.41241 |
| O  | 1.540336 | 1.47145  | -0.7791  |
| N  | -1.29539 | 0.827827 | -0.46862 |
| N  | 0.720118 | -0.08539 | 1.457238 |
| C  | -1.46324 | -2.05081 | -1.5377  |
| C  | -1.67563 | -3.42887 | -1.70196 |
| C  | -2.96887 | -3.94128 | -1.77817 |
| H  | -3.12757 | -5.00617 | -1.90171 |
| C  | -4.05059 | -3.06354 | -1.68867 |
| C  | -3.85441 | -1.68915 | -1.5355  |
| H  | -4.71118 | -1.02498 | -1.48411 |
| C  | -2.55802 | -1.17625 | -1.46845 |
| C  | -2.31072 | 0.310837 | -1.45206 |
| H  | -1.94811 | 0.624175 | -2.44042 |
| H  | -3.26037 | 0.828188 | -1.28362 |
| C  | -1.20415 | 2.339204 | -0.66984 |
| H  | -0.8298  | 2.480359 | -1.68686 |
| H  | -0.42861 | 2.706527 | -0.00099 |
| C  | -2.47468 | 3.138279 | -0.45969 |
| C  | -3.32459 | 3.439099 | -1.53587 |
| H  | -3.07371 | 3.09102  | -2.53529 |
| C  | -4.47639 | 4.203278 | -1.34617 |
| H  | -5.11782 | 4.431204 | -2.19237 |
| C  | -4.79424 | 4.686164 | -0.07495 |
| H  | -5.68792 | 5.28517  | 0.072534 |
| C  | -3.9477  | 4.414342 | 1.001447 |
| H  | -4.17596 | 4.807282 | 1.987869 |
| C  | -2.79482 | 3.652363 | 0.807211 |
| H  | -2.12421 | 3.48211  | 1.64706  |
| C  | -1.66261 | 0.474725 | 0.930045 |
| H  | -1.95656 | -0.57901 | 0.939421 |
| H  | -2.53095 | 1.054111 | 1.266979 |
| C  | -0.4838  | 0.718084 | 1.861553 |
| H  | -0.19282 | 1.769489 | 1.849553 |
| H  | -0.75222 | 0.471008 | 2.893244 |
| C  | 0.633899 | -1.5207  | 2.002142 |
| H  | -0.23607 | -1.97472 | 1.519953 |
| H  | 1.517796 | -2.03572 | 1.623531 |

|   |          |          |          |
|---|----------|----------|----------|
| C | 0.536283 | -1.66883 | 3.504032 |
| C | -0.71425 | -1.77556 | 4.133444 |
| H | -1.62423 | -1.75604 | 3.536918 |
| C | -0.80617 | -1.94028 | 5.51612  |
| H | -1.78119 | -2.0273  | 5.986342 |
| C | 0.354482 | -2.01023 | 6.289015 |
| H | 0.284814 | -2.14425 | 7.364369 |
| C | 1.605602 | -1.92955 | 5.673423 |
| H | 2.511583 | -2.0083  | 6.266934 |
| C | 1.695284 | -1.76528 | 4.290861 |
| H | 2.674339 | -1.73532 | 3.81862  |
| C | 1.983956 | 0.57574  | 1.962242 |
| H | 2.803724 | -0.09773 | 1.697647 |
| H | 1.927182 | 0.614872 | 3.054274 |
| C | 2.284964 | 1.970274 | 1.439921 |
| C | 2.82987  | 2.904473 | 2.325004 |
| H | 2.954093 | 2.653686 | 3.373462 |
| C | 3.239369 | 4.15838  | 1.867763 |
| C | 3.10074  | 4.514048 | 0.526839 |
| H | 3.416712 | 5.488575 | 0.173945 |
| C | 2.536161 | 3.598468 | -0.35798 |
| C | 2.127743 | 2.327258 | 0.082283 |
| O | 2.395673 | -1.12603 | -1.74638 |
| H | 2.071914 | -2.00724 | -2.044   |

**Table S18.** Geometry optimized coordinates of  $\text{TiOOH}_{\text{TS}}^{\oplus}$  at the B3LYP/LANL2DZ, 6-31G(d) level of theory.

E = -4128.3029438 Hartree/particle

Calculated frequency along the bond H27O4•••O1•••S1 is i338.

|    |          |          |          |
|----|----------|----------|----------|
| Ti | -0.06622 | 0.104876 | -1.28978 |
| Cl | -2.96359 | -3.55857 | -0.60605 |
| Cl | -7.22422 | -0.44028 | 0.619907 |
| Cl | 6.403585 | 2.235143 | 1.831229 |
| Cl | 3.147039 | 3.215862 | -2.3994  |
| O  | 0.184606 | -0.469   | -3.04287 |
| O  | -1.5748  | -0.94555 | -0.97104 |
| O  | 1.557049 | 0.968654 | -1.2295  |
| N  | -1.22569 | 1.720411 | -0.28791 |
| N  | 0.590163 | -0.35023 | 0.925269 |
| C  | -2.85927 | -0.82902 | -0.6064  |

|   |          |          |          |
|---|----------|----------|----------|
| C | -3.65813 | -1.96926 | -0.39176 |
| C | -4.99645 | -1.86102 | -0.02327 |
| H | -5.59268 | -2.7526  | 0.130684 |
| C | -5.54988 | -0.5929  | 0.147082 |
| C | -4.77939 | 0.55257  | -0.04825 |
| H | -5.22861 | 1.530496 | 0.093259 |
| C | -3.44013 | 0.446739 | -0.43319 |
| C | -2.66431 | 1.715827 | -0.72042 |
| H | -2.65591 | 1.931316 | -1.79471 |
| H | -3.174   | 2.554447 | -0.23549 |
| C | -0.59593 | 3.064229 | -0.65865 |
| H | -0.60489 | 3.096081 | -1.75112 |
| H | 0.447446 | 3.009201 | -0.34959 |
| C | -1.24385 | 4.303019 | -0.07864 |
| C | -2.2523  | 4.985006 | -0.77774 |
| H | -2.57553 | 4.620826 | -1.75032 |
| C | -2.82815 | 6.142437 | -0.25291 |
| H | -3.60274 | 6.660477 | -0.81073 |
| C | -2.39758 | 6.6418   | 0.978254 |
| H | -2.84158 | 7.545729 | 1.384643 |
| C | -1.37938 | 5.98787  | 1.674345 |
| H | -1.02268 | 6.385056 | 2.620185 |
| C | -0.80454 | 4.831123 | 1.145892 |
| H | 0.01386  | 4.35208  | 1.679538 |
| C | -1.14426 | 1.438489 | 1.185778 |
| H | -1.92181 | 0.709479 | 1.419176 |
| H | -1.3864  | 2.350787 | 1.74227  |
| C | 0.218848 | 0.918349 | 1.623341 |
| H | 0.9939   | 1.655687 | 1.408183 |
| H | 0.21689  | 0.770832 | 2.709961 |
| C | -0.13897 | -1.5568  | 1.499079 |
| H | -1.2039  | -1.36989 | 1.374138 |
| H | 0.111984 | -2.39508 | 0.843514 |
| C | 0.148565 | -1.91476 | 2.943768 |
| C | -0.62384 | -1.37218 | 3.983072 |
| H | -1.44231 | -0.69382 | 3.751055 |
| C | -0.38044 | -1.71708 | 5.313373 |
| H | -0.99146 | -1.28965 | 6.103079 |
| C | 0.6347   | -2.62338 | 5.624823 |
| H | 0.821834 | -2.89777 | 6.658806 |
| C | 1.394379 | -3.19184 | 4.600147 |
| H | 2.17     | -3.91523 | 4.834752 |
| C | 1.149661 | -2.84318 | 3.271255 |
| H | 1.726659 | -3.3131  | 2.477898 |
| C | 2.071011 | -0.60384 | 1.020528 |
| H | 2.266956 | -1.47941 | 0.386454 |



|   |          |          |          |
|---|----------|----------|----------|
| H | 2.317783 | -0.89377 | 2.046728 |
| C | 2.965656 | 0.542744 | 0.615648 |
| C | 4.114583 | 0.845531 | 1.346975 |
| H | 4.353948 | 0.291035 | 2.248783 |
| C | 4.964116 | 1.865096 | 0.913036 |
| C | 4.678979 | 2.600649 | -0.23776 |
| H | 5.340316 | 3.393677 | -0.56642 |
| C | 3.526922 | 2.305205 | -0.96403 |
| C | 2.665457 | 1.274375 | -0.54731 |
| O | -0.86259 | 0.861904 | -3.01391 |
| H | -1.67458 | 0.382026 | -3.26458 |
| S | 1.859261 | -2.11384 | -3.04083 |
| C | 1.854773 | -3.48011 | -1.8776  |
| C | 3.080045 | -3.8295  | -1.29025 |
| C | 0.68022  | -4.15749 | -1.51918 |
| C | 3.127776 | -4.86562 | -0.35424 |
| C | 0.741531 | -5.19682 | -0.59011 |
| C | 1.961998 | -5.55211 | -0.0066  |
| H | 3.98901  | -3.31106 | -1.58142 |
| H | -0.27362 | -3.87424 | -1.95271 |
| H | 4.079961 | -5.14622 | 0.086582 |
| H | -0.16647 | -5.72771 | -0.31935 |
| H | 2.00352  | -6.36622 | 0.710956 |
| C | 1.008863 | -2.81952 | -4.49572 |
| H | -0.00681 | -3.12791 | -4.24309 |
| H | 0.972398 | -2.02132 | -5.23934 |
| H | 1.587189 | -3.66378 | -4.87724 |

**Table S19.** Natural charge analysis of **4b'**–**4h'**.

| moiety/compound | center | natural charge |            |            |            |            |            |            |
|-----------------|--------|----------------|------------|------------|------------|------------|------------|------------|
|                 |        | <b>4b'</b>     | <b>4c'</b> | <b>4d'</b> | <b>4e'</b> | <b>4f'</b> | <b>4g'</b> | <b>4h'</b> |
| metal           | Ti1    | 1.536          | 1.573      | 1.554      | 1.428      | 1.528      | 1.469      | 1.447      |
| peroxo          | O1     |                | -0.408     | -0.503     | -0.907     | -0.995     | -0.978     | -0.376     |
|                 | O4     |                | -0.365     | -0.516     | -0.706     | -0.797     | -0.877     | -0.454     |
| sulfide         | S1     |                |            | 0.596      | 1.317      | 1.307      | 1.291      |            |

**Table S20.** Natural charge analysis of thioanisole and H<sub>2</sub>O<sub>2</sub>.

| moiety/compound | center | natural charge |                               |
|-----------------|--------|----------------|-------------------------------|
|                 |        | thioanisole    | H <sub>2</sub> O <sub>2</sub> |
| sulfide         | S1     | 0.292          |                               |
| peroxo          | O1     |                | -0.480                        |
|                 | O2     |                | -0.480                        |

**Table S21.** Selectivity of sulfoxide formation based on the oxidant (H<sub>2</sub>O<sub>2</sub>) consumed.

| entry | substrate                                                                           | product                                                                             | conversion % |     |     |     |
|-------|-------------------------------------------------------------------------------------|-------------------------------------------------------------------------------------|--------------|-----|-----|-----|
|       |                                                                                     |                                                                                     | 1b           | 2b  | 3b  | 4b  |
| 1.    | 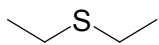   |    | 59           | 67  | 82  | 69  |
| 2.    |    |    | 83           | 69  | 96  | 89  |
| 3.    |    |    | 81           | 94  | >99 | 89  |
| 4.    |    |    | 69           | 81  | 83  | 65  |
| 5.    |    |    | 79           | 92  | 91  | 87  |
| 6.    |   |   | 78           | 93  | >99 | 94  |
| 7.    |  |  | 83           | 75  | 91  | 86  |
| 8.    |  |  | >99          | >99 | 79  | 90  |
| 9.    |  |  | >99          | >99 | >99 | >99 |
| 10.   |  |  | >99          | >99 | >99 | >99 |

<sup>a</sup>Reaction conditions: 2.00 mmol of substituted thioether, 2.00 mmol of H<sub>2</sub>O<sub>2</sub>, 2.00 mmol of internal standard (1,2-dichlorobenzene) and  $1.00 \times 10^{-2}$  mmol Ti catalyst, in CH<sub>3</sub>OH (5 mL) at room temperature (30 minute). Products were quantified by GC analysis with respect to internal standard and identified by GCMS analysis.
